# Supplementary material for: Potential drug targets for prostate cancer ： A mendelian randomization study and application for target-derived drug design
Source: Research Square preprint supplement (doi:10.21203/rs.3.rs-4954410/v1), 2024-09-02
Supplement: Supplementary file 1 [file 3cfacb139d2b7c157c2d9571.xlsx]

## Sheet: Sheet1
Protein	SNP	Uniprot ID	Effect allele	Pval	OR	PVE（%）	F stat
MSMB	rs10993994	P08118	C	2.52e-148	0.81(0.80,0.82)	5.07	176.24
IGF2R	rs629849	P11717	G	4.57e-10	0.92(0.90,0.94)	1.46	48.967
KDELC2	rs74911261	Q7Z4H8	A	1.89e-08	0.89(0.86,0.93)	0.61	20.252
TNFRSF10B	rs4871844	O14763	T	2.41e-07	0.74(0.65,0.83)	0.6	33.002
SPINT2	rs71354995	O43291	G	1.49e-06	1.05(1.03,1.06)	3.58	122.49
GSTP1	rs1695	P09211	G	4.22e-05	0.82(0.75,0.90)	0.7	33.448
