# Supplementary material for: Potential drug targets for prostate cancer ： A mendelian randomization study and application for target-derived drug design
Source: Research Square preprint supplement (doi:10.21203/rs.3.rs-4954410/v1), 2024-09-02
Supplement: Supplementary file 1 [file 9b62939428a7e972b6ea51b3.pdf]

**Potential drug targets for prostate cancer: A mendelian randomization study and application for target-derived drug design**

**Supplementary Figure 1.** the results of Bidirectional MR analysis for prostate cancer on levels of six initial screening proteins

**Supplementary Figure 2.** the results of colocalization analysis of six potential proteins for prostate cancer

**Supplementary Figure 3.** Protein-Protein interaction network between potential causal proteins and affirmed drug targets for PCa

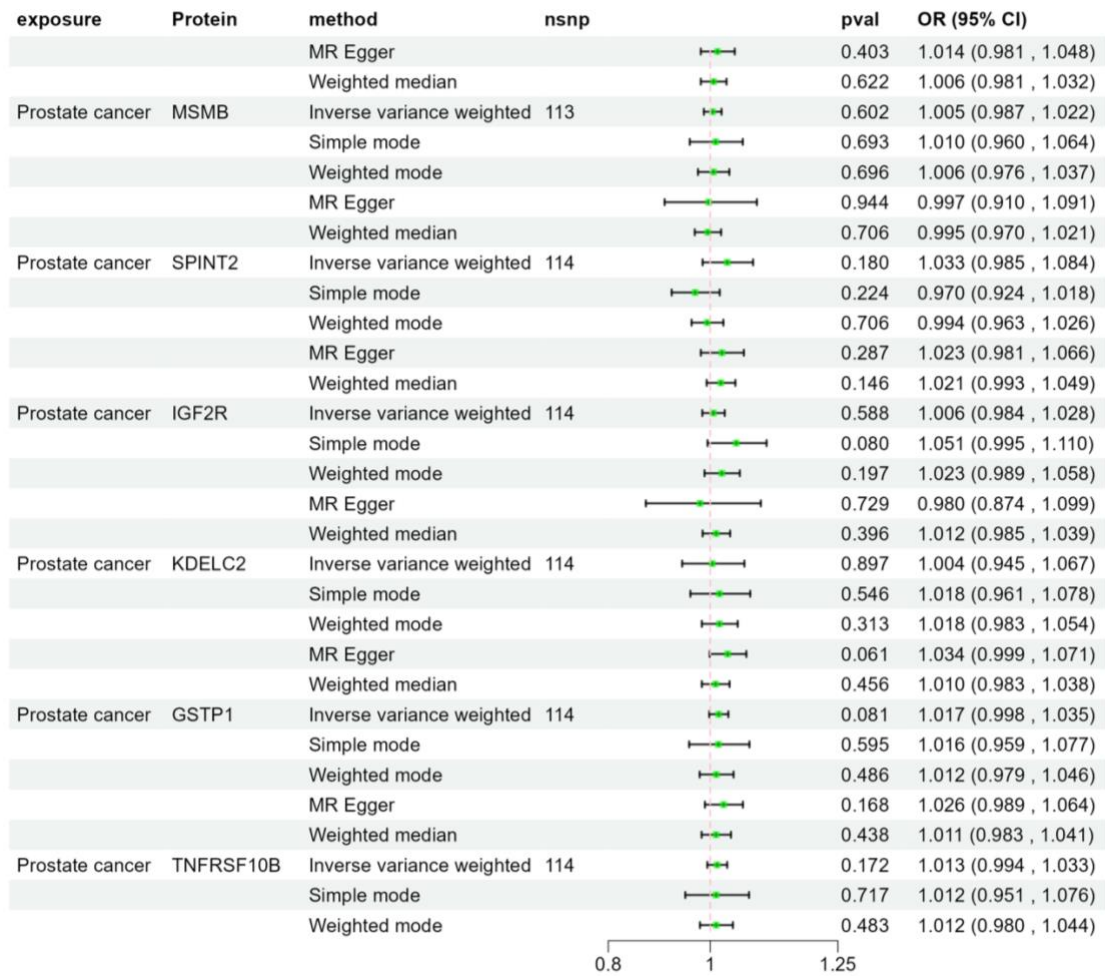

**Supplementary Figure 1. the results of Bidirectional MR analysis for prostate cancer on levels of six initial screening proteins OR: odd ratios, nsnp: the numbers of single nucleotide polymorphisms**

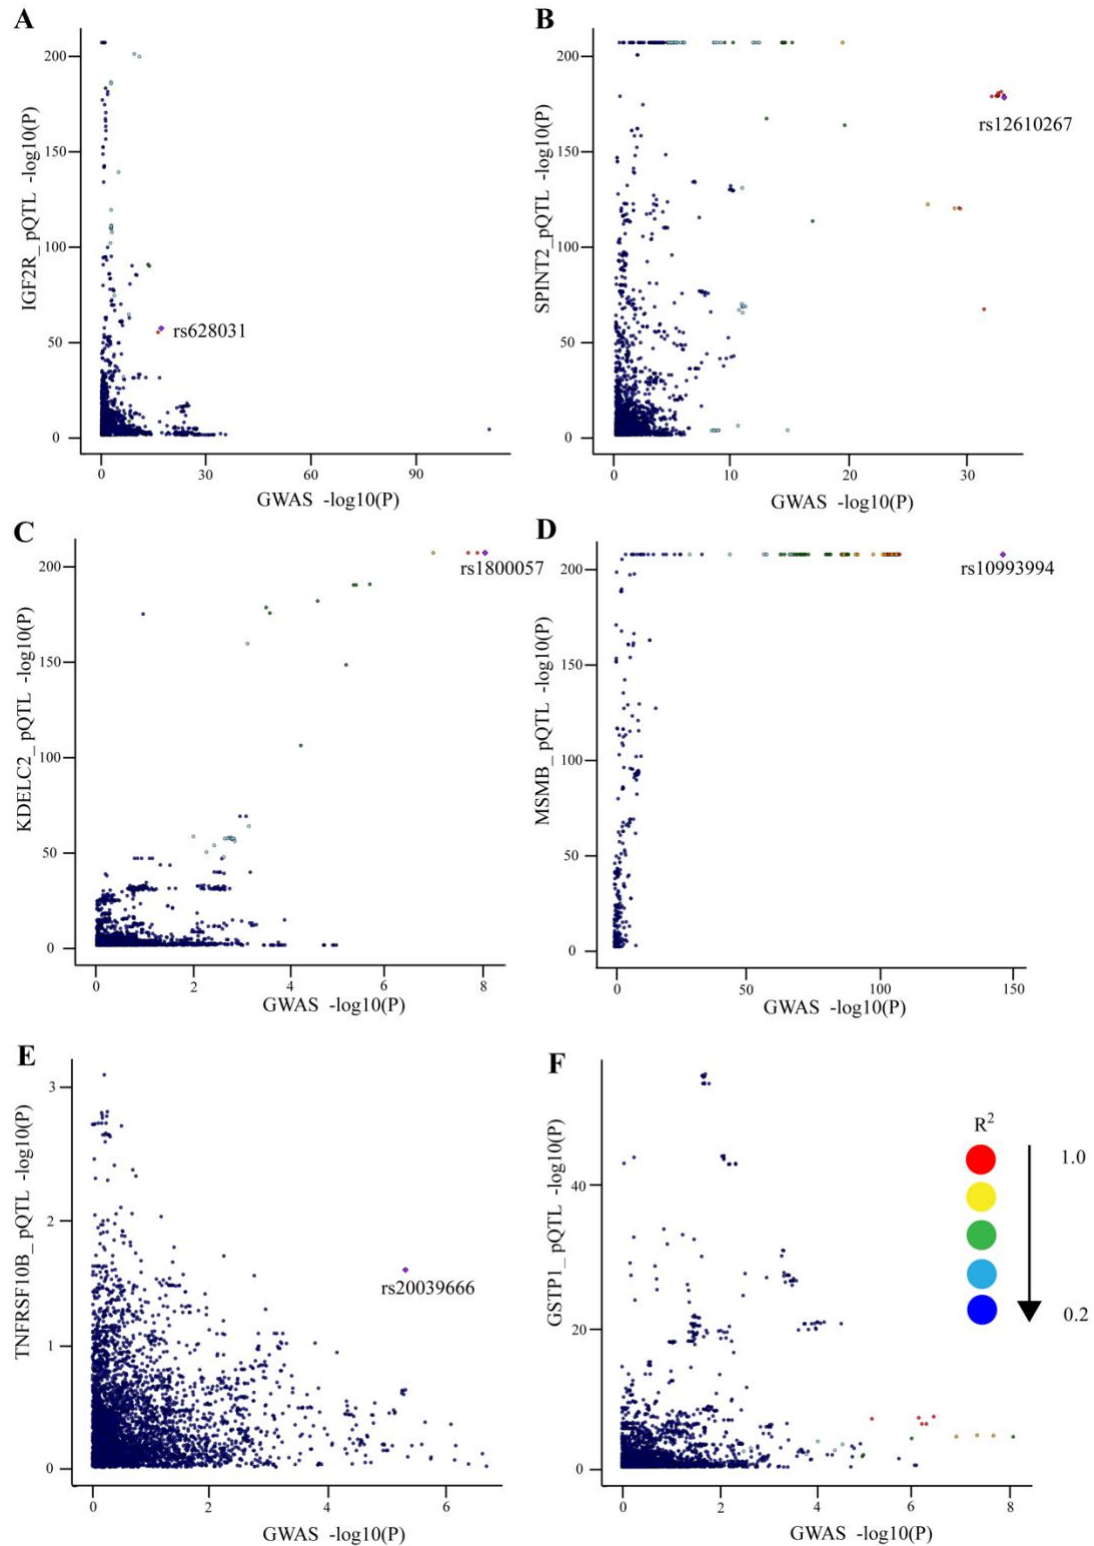

**Supplementary Figure 2. the results of colocalization analysis of six potential proteins for prostate cancer** Bayesian co-localization analysis of initial screening proteins for IGF2R(A), SPINT2(B), KDELC2(C), MSMB(D), TNFRSF10B(E),

GSTP1(F), respectively, the SNP about minimal sum of P value in corresponded protein QTLs and prostate cancer GWAS was shown in purple points and marked.

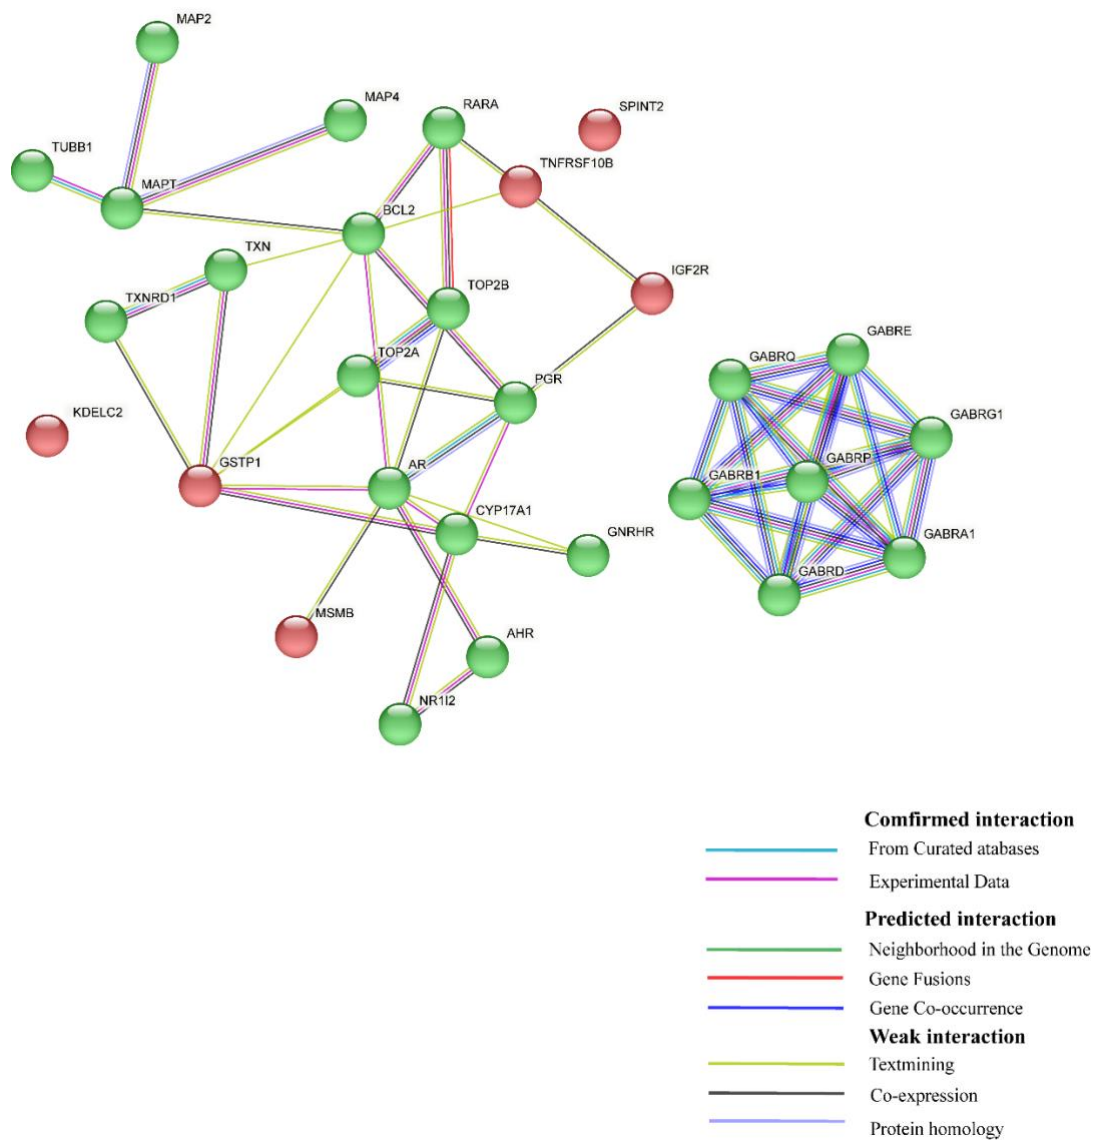

**Supplementary Figure 3. Protein-Protein interaction network between potential causal proteins and affirmed drug targets for PCa.** Red core symbolize the potential causal proteins. Green core symbolize the affirmed drug targets for PCa. Different color

lines symbolize the different connection between proteins.
