# Supplementary material for: Potential drug targets for prostate cancer ： A mendelian randomization study and application for target-derived drug design
Source: Research Square preprint supplement (doi:10.21203/rs.3.rs-4954410/v1), 2024-09-02
Supplement: Supplementary file 2 [file 5aa0238480028d66ef51a1ea.xlsx]

## Sheet: Sheet1
Protein	SNP	UniProt ID	Bidirectional MR	Steiger filtering	Co-localization (PPH4)	Previously reported associations
			(MR-IVW)
MSMB	rs10993994	P08118	0.602	1.77e-156	0.861	prostate cancer
IGF2R	rs629849	P11717	0.588	6.94e-154	3.32e-105	NA
KDELC2	rs74911261	Q7Z4H8	0.897	8.64e-63	0.997	Uterine fibroids,
						Impedance of whole body,
						Renal cell carcinoma,
						Blood cell phenotype,
						Breast cancer
TNFRSF	rs4871844	O14763	0.171	1.19e-05	0.014	NA
10B
SPINT2	rs71354995	O43291	0.188	1.29e-195	5.5e-14	Platelet phenotype change
GSTP1	rs1695	P09211	0.082	2.57e-10	0.00024	Height,
						Blood cell phenotype
