# Supplementary material for: Potential drug targets for prostate cancer ： A mendelian randomization study and application for target-derived drug design
Source: Research Square preprint supplement (doi:10.21203/rs.3.rs-4954410/v1), 2024-09-02
Supplement: Supplementary file 3 [file 8690de0764196b4cd7616ef3.xlsx]

## Sheet: Table S1
Supplementary Table 1. Instrumental variables of plasma proteins applied in MR analysis
id.exposure	SNP	chr.exposure	pos	effect_allele.exposure	other_allele.exposure	eaf.exposure	beta.exposure	se.exposure	pval.exposure	samplesize.exposure	samplesize	nIV	R2
CLEC3B	rs2056320	3	45092415	G	A	0.763	0.213	0.209	1.38E-23	3301	3301	1	2.08E-05
APOB	rs520354	2	21259612	G	A	0.473	0.303	0.042	6.93E-13	3788	3788	1	0.00103984
SIGLEC9	rs2075803	19	51628529	G	A	0.551	-1.226	0.012	1.00E-200	3301	3301	1	0.172706
CLEC12A	rs2961544	12	10136672	A	G	0.639	-1.254	0.013	1.00E-200	3301	3301	1	0.156898
ICAM1	rs5498	19	10395683	G	A	0.431	-1.199	0.014	1.00E-200	3301	3301	1	0.127928
SIRPA	rs6136377	20	1896288	G	A	0.369	-1.211	0.015	1.00E-200	3301	3301	1	0.115324
TAPBPL	rs2532497	12	6564210	A	G	0.274	1.258	0.016	1.00E-200	3301	3301	1	0.110034
CPA4	rs34587586	7	129938598	T	G	0.393	-1.166	0.015	1.00E-200	3301	3301	1	0.107819
LILRB5	rs12975366	19	54759361	C	T	0.405	-1.161	0.015	1.00E-200	3301	3301	1	0.106996
LEPR	rs3790438	1	66085525	A	T	0.175	-1.375	0.022	1.00E-200	3301	3301	1	0.0724638
LILRA3	rs398217	19	54793038	A	G	0.773	1.243	0.02	1.00E-200	5457	5457	1	0.0717125
ERAP2	rs2927608	5	96252432	A	G	0.437	1.052	0.017	1.00E-200	3301	3301	1	0.07114
HSP90B1	rs1165693	12	104340204	A	G	0.321	1.097	0.018	1.00E-200	3301	3301	1	0.0691479
FCGR2B	rs6665610	1	161641384	A	G	0.205	1.331	0.022	1.00E-200	3301	3301	1	0.0682116
BST1	rs73224660	4	15714762	A	G	0.159	-1.397	0.024	1.00E-200	3301	3301	1	0.0634636
TMEM190	rs4806666	19	55888095	T	C	0.438	-0.997	0.018	1.00E-200	3301	3301	1	0.0578114
EBI3	rs10409421	19	4254752	A	G	0.716	1.049	0.019	1.00E-200	5457	5457	1	0.057461
IL1RAP	rs6444442	3	190346060	G	A	0.841	-1.352	0.025	1.00E-200	3301	3301	1	0.0552606
PNLIPRP2	rs7910135	10	118398046	C	A	0.493	-0.969	0.018	1.00E-200	5457	5457	1	0.0547852
PCSK1	rs6234	5	95728974	C	G	0.26	-1.098	0.021	1.00E-200	3301	3301	1	0.0518414
MSMB	rs10993994	10	51549496	C	T	0.596	0.982	0.019	1.00E-200	3301	3301	1	0.0507157
LILRB2	rs386056	19	54782919	T	C	0.201	-1.15	0.023	1.00E-200	3301	3301	1	0.047619
CLEC4C	rs11055602	12	7904111	T	G	0.567	-0.95	0.019	1.00E-200	5457	5457	1	0.047619
CRELD1	rs7627326	3	9981734	T	G	0.24	-1.094	0.022	1.00E-200	3301	3301	1	0.0471254
RARRES1	rs61696028	3	158455703	C	A	0.146	1.337	0.027	1.00E-200	3301	3301	1	0.046749
ENPP7	rs11871061	17	77706544	C	T	0.359	0.987	0.02	1.00E-200	3301	3301	1	0.0464461
LIPN	rs10509554	10	90525792	T	C	0.307	1.017	0.021	1.00E-200	3301	3301	1	0.0448049
MANEA	rs80268500	6	96009498	C	T	0.082	-1.681	0.035	1.00E-200	3301	3301	1	0.0441003
CFHR1	rs57809726	1	196841377	A	G	0.862	1.295	0.027	1.00E-200	5457	5457	1	0.0439852
ACP1	rs11553746	2	272203	T	C	0.325	1.237	0.026	1.00E-200	3788	3788	1	0.0433105
PLA2R1	rs3749117	2	160885442	C	T	0.501	-0.902	0.019	1.00E-200	3301	3301	1	0.0431309
MBL2	rs7899547	10	54536839	G	T	0.653	0.948	0.02	1.00E-200	3301	3301	1	0.0430029
PDGFRB	rs2304058	5	149508544	G	C	0.557	0.931	0.02	1.00E-200	3301	3301	1	0.0415379
GSTO1	rs2282326	10	106020398	C	A	0.354	-0.911	0.02	1.00E-200	3301	3301	1	0.0398427
CD33	rs12459419	19	51728477	T	C	0.329	-0.944	0.021	1.00E-200	3301	3301	1	0.0388445
CCL16	rs112689088	17	34307457	C	T	0.098	-1.525	0.034	1.00E-200	3301	3301	1	0.0386794
SEMA5A	rs17329170	5	9547242	A	G	0.101	1.432	0.032	1.00E-200	3301	3301	1	0.0385089
CHIT1	rs872583	1	203184766	C	T	0.202	-1.098	0.025	1.00E-200	3301	3301	1	0.0371463
CCL15	rs854624	17	34327923	T	G	0.931	-1.691	0.039	1.00E-200	3301	3301	1	0.0362375
SPINT2	rs71354995	19	38791841	G	A	0.243	-0.991	0.023	1.00E-200	3301	3301	1	0.0358005
ACP6	rs2153463	1	147124310	G	T	0.739	0.944	0.022	1.00E-200	5457	5457	1	0.035516
PLA2G2A	rs11573156	1	20306146	C	G	0.232	1.021	0.024	1.00E-200	3301	3301	1	0.0349315
HBZ	rs2461286	16	203254	G	A	0.647	-0.885	0.021	1.00E-200	3301	3301	1	0.034302
SLAMF7	rs11581248	1	160720074	T	C	0.142	-1.26	0.03	1.00E-200	3301	3301	1	0.0340777
FUT8	rs2127870	14	65796846	C	G	0.785	-1.049	0.025	1.00E-200	3301	3301	1	0.0340151
ADA2	rs2231495	22	17669306	C	T	0.333	-0.879	0.021	1.00E-200	3301	3301	1	0.0338541
ST3GAL6	rs72934623	3	98509705	A	G	0.053	-1.878	0.045	1.00E-200	3301	3301	1	0.0336609
RNASE6	rs11622942	14	21250846	T	G	0.233	0.997	0.024	1.00E-200	3301	3301	1	0.0333627
CRYZ	rs3819946	1	75175886	T	C	0.861	-1.175	0.029	1.00E-200	5457	5457	1	0.0317892
SIGLEC12	rs3826667	19	52004074	T	C	0.835	-1.127	0.028	1.00E-200	3301	3301	1	0.0313844
PROK2	rs7644362	3	71829242	A	G	0.798	-1.001	0.025	1.00E-200	5457	5457	1	0.0310679
LRP11	rs9371533	6	150210681	A	G	0.376	0.825	0.021	1.00E-200	5457	5457	1	0.0299431
LILRB1	rs2114511	19	55145093	C	G	0.051	-1.806	0.046	1.00E-200	3301	3301	1	0.0299064
ERAP1	rs17482078	5	96118866	T	C	0.216	-0.962	0.025	1.00E-200	3301	3301	1	0.0287624
FCRL4	rs11582663	1	157559122	T	C	0.144	-1.133	0.03	1.00E-200	3301	3301	1	0.0277352
ENPP5	rs1047153	6	46128745	T	C	0.646	-0.789	0.021	1.00E-200	3301	3301	1	0.0274571
SIGLEC14	rs1106476	19	52130637	A	T	0.117	-1.192	0.032	1.00E-200	3301	3301	1	0.0270019
AOC1	rs10452848	7	150523544	A	G	0.498	-0.765	0.021	1.00E-200	5457	5457	1	0.0258546
PTGFRN	rs4233450	1	117490261	T	G	0.829	1.001	0.028	1.00E-200	3301	3301	1	0.0249242
FUT3	rs708686	19	5840619	T	C	0.274	-0.853	0.024	1.00E-200	3301	3301	1	0.0246417
B3GNT8	rs284663	19	41932612	T	C	0.56	0.744	0.021	1.00E-200	5457	5457	1	0.0244889
LILRA6	rs35361042	19	54748737	G	C	0.091	1.34	0.038	1.00E-200	3301	3301	1	0.0242663
SEMA3E	rs3757607	7	83034362	C	G	0.122	-1.12	0.032	1.00E-200	3301	3301	1	0.0239141
IL18R1	rs1420106	2	103035044	G	A	0.776	-0.909	0.026	1.00E-200	3301	3301	1	0.0238628
CBR3	rs1028997	21	37532222	A	G	0.376	-0.764	0.022	1.00E-200	3301	3301	1	0.0235516
TCN2	rs4820885	22	31012756	C	T	0.549	-0.725	0.021	1.00E-200	3301	3301	1	0.0232829
MIA	rs2604877	19	41275048	C	T	0.068	1.442	0.042	1.00E-200	3301	3301	1	0.0230325
ICAM5	rs281439	19	10400110	C	G	0.78	0.892	0.026	1.00E-200	3301	3301	1	0.022999
ART4	rs1001096	12	14988455	A	G	0.397	0.74	0.022	1.00E-200	3301	3301	1	0.0221274
GLCE	rs11854180	15	69559340	T	G	0.769	0.829	0.025	1.00E-200	3301	3301	1	0.0215185
CTSH	rs34593439	15	79234957	A	G	0.111	-1.147	0.035	1.00E-200	3301	3301	1	0.0210277
CBLN1	rs10852587	16	49006458	A	T	0.144	-1.081	0.033	1.00E-200	3301	3301	1	0.0210103
IL27RA	rs35026308	19	14153293	C	T	0.176	-0.946	0.029	1.00E-200	3301	3301	1	0.0208387
LCT	rs4988235	2	136608646	A	G	0.711	0.776	0.024	1.00E-200	3301	3301	1	0.0204807
GPC5	rs342702	13	92422946	T	G	0.274	-0.804	0.025	1.00E-200	3301	3544.5	2	0.0213667
VEGFA	rs6921438	6	43925607	A	G	0.497	-0.702	0.022	1.00E-200	3301	3301	1	0.0199574
SFTPB	rs1130866	2	85893741	A	G	0.466	-0.686	0.022	3.50E-189	5457	5457	1	0.0190752
SEMA4D	rs45464494	9	91994433	C	T	0.929	1.278	0.041	1.50E-187	5457	5457	1	0.0190619
SIRPB1	rs3848788	20	1543066	A	G	0.305	0.745	0.024	1.00E-200	3301	3301	1	0.0189073
HP	rs217184	16	72105965	C	T	0.196	0.869	0.028	1.00E-200	3301	3301	1	0.0189002
GNLY	rs12151621	2	85934499	A	C	0.227	0.774	0.026	7.40E-189	3301	3301	1	0.0174155
CA6	rs3765963	1	9034598	G	A	0.402	0.677	0.023	4.10E-185	3301	3301	1	0.017033
OLFM2	rs56243392	19	10061960	A	T	0.651	-0.673	0.024	6.00E-157	5457	5457	1	0.0154832
OXT	rs877172	20	3049890	T	G	0.66	-0.669	0.024	5.60E-156	5457	5457	1	0.0153025
HIBCH	rs291447	2	191177005	A	C	0.393	-0.631	0.023	2.90E-152	5457	5457	1	0.0148301
LPA	rs55730499	6	161005610	C	T	0.939	-1.255	0.046	3.77E-167	3301	3301	1	0.0146684
IGF2R	rs629849	6	160494409	G	A	0.871	0.899	0.033	9.50E-163	3301	3301	1	0.0146259
WFIKKN2	rs7225465	17	48916159	A	G	0.682	-0.653	0.024	9.30E-166	3301	3301	1	0.0145899
PSG3	rs2355433	19	43679088	G	A	0.548	-0.652	0.024	1.60E-163	3301	3301	1	0.0145459
CTRB1	rs8051363	16	75255217	G	A	0.704	0.647	0.024	1.60E-157	3301	3301	1	0.0143268
ITIH2	rs73621225	10	7740905	T	A	0.933	-1.181	0.044	1.40E-142	5457	5457	1	0.014204
NQO1	rs77944668	16	69718112	A	G	0.193	-0.75	0.028	1.60E-154	3301	3301	1	0.0141465
PSG4	rs1138888	19	43696022	A	T	0.624	-0.666	0.025	5.40E-163	3301	3301	1	0.0139951
ACE	rs4344	17	61566724	A	G	0.499	-0.583	0.022	8.50E-136	5457	5457	1	0.0138505
PZP	rs7311982	12	9314857	C	T	0.698	0.5	0.019	2.70E-135	5457	5457	1	0.0136612
GRAMD1C	rs61077924	3	113625933	G	C	0.324	0.62	0.024	3.40E-148	3301	3301	1	0.0131714
CPNE1	rs12481228	20	34218673	C	G	0.098	-0.977	0.038	1.80E-146	3301	3301	1	0.0130481
IDUA	rs3822020	4	985727	G	A	0.637	0.608	0.024	7.20E-148	3301	3301	1	0.0126729
HAVCR2	rs6874178	5	156530149	T	A	0.817	-0.734	0.029	1.00E-145	3301	3301	1	0.0126502
CFHR4	rs4915559	1	196886770	T	C	0.753	0.655	0.026	1.70E-131	5457	5457	1	0.012534
CRISP2	rs478328	6	49720877	G	A	0.454	0.57	0.023	4.20E-139	3301	3301	1	0.0121345
PSAP	rs7086891	10	73655350	G	A	0.709	0.619	0.025	3.60E-122	5457	5457	1	0.0121126
PCYOX1	rs2706762	2	70488470	C	T	0.86	0.79	0.032	1.40E-121	5457	5457	1	0.0120427
BTD	rs13100619	3	15549967	A	C	0.962	1.431	0.058	4.40E-122	5457	5457	1	0.0120281
LAMC2	rs2276543	1	183155305	A	G	0.279	0.616	0.025	4.40E-133	3301	3301	1	0.0119969
SPINK6	rs1432688	5	147603178	G	A	0.924	1.058	0.043	7.60E-135	3301	3301	1	0.0119629
ECM1	rs13294	1	150484987	A	G	0.398	-0.849	0.035	7.73E-102	3788	3788	1	0.0116313
AKR1A1	rs72688441	1	46051053	A	G	0.059	-1.18	0.049	1.20E-126	3301	3301	1	0.0114655
AHSG	rs35094235	3	186328951	G	T	0.731	0.625	0.026	2.00E-132	3301	3301	1	0.0114249
ASAH2;AS AH2B	rs10740617	10	52027609	C	A	0.794	0.667	0.028	2.00E-124	3301	3301	1	0.0112219
H6PD	rs34603401	1	9305445	C	A	0.15	0.759	0.032	1.00E-126	3301	3301	1	0.0111264
S100A7	rs3014860	1	153314782	A	G	0.948	-1.208	0.051	1.80E-114	5457	5457	1	0.0110963
SPINT3	rs6017591	20	44141041	C	T	0.541	0.543	0.023	6.00E-127	3301	3301	1	0.0110245
KNG1	rs2304456	3	186445052	G	T	0.103	-1.366	0.058	2.89E-97	3788	3788	1	0.010972
FAH	rs11555096	15	80472526	T	C	0.021	-1.882	0.08	1.90E-121	3301	3301	1	0.0109473
LBP	rs73112473	20	37006729	C	T	0.922	1.009	0.043	2.40E-112	5457	5457	1	0.0108923
CXCL6	rs16850073	4	74703999	T	C	0.377	0.888	0.038	9.66E-98	3788	3788	1	0.0108037
TIMP3	rs2097326	22	33165020	G	A	0.279	0.931	0.04	4.42E-97	3788	3788	1	0.0107184
FUT5	rs778809	19	5830302	A	G	0.301	-0.58	0.025	1.30E-118	3301	3301	1	0.0106502
PEBP1	rs76597567	12	118584885	A	G	0.982	1.971	0.085	4.00E-111	5457	5457	1	0.0106395
PLXNB2	rs28573806	22	50727792	C	T	0.4	0.532	0.023	3.50E-116	3301	3301	1	0.0105871
PRSS57	rs9304936	19	689590	G	C	0.715	0.599	0.026	7.50E-107	5457	5457	1	0.0105039
TMEM132A	rs11230521	11	60698732	A	G	0.231	0.618	0.027	2.00E-112	3301	3301	1	0.0103694
TNFAIP6	rs289828	2	152137181	T	C	0.622	-0.548	0.024	5.50E-118	3301	3301	1	0.0103196
FCRL3	rs7528684	1	157670816	G	A	0.465	0.525	0.023	1.40E-112	3301	3301	1	0.0103131
CD177	rs73554000	19	43825494	C	G	0.024	1.803	0.079	4.40E-116	3301	3301	1	0.0103102
MANSC4	rs36138811	12	27927881	C	T	0.232	0.637	0.028	7.40E-117	3301	3301	1	0.0102452
PDIA5	rs2278668	3	122835232	C	T	0.593	-0.522	0.023	4.00E-110	3301	3301	1	0.0101968
IL17RA	rs3827278	22	17595915	A	C	0.232	0.975	0.043	1.97E-93	3788	3788	1	0.0101779
LILRA5	rs759819	19	54815577	C	T	0.33	-0.543	0.024	2.50E-111	3301	3301	1	0.0101341
CCL25	rs74959615	19	8121096	A	G	0.078	-0.972	0.043	5.20E-114	3301	3301	1	0.010116
CTSC	rs55897509	11	88066714	A	C	0.918	-0.926	0.041	2.30E-107	5457	5457	1	0.0100989
MANBA	rs227370	4	103612043	C	T	0.675	-0.56	0.025	7.80E-113	3301	3301	1	0.0099355
CDH11	rs59614634	16	65029943	A	T	0.89	0.803	0.036	3.40E-101	5457	5457	1	0.00985271
MMP12	rs28381684	11	102737192	T	A	0.125	-0.779	0.035	5.10E-111	3301	3301	1	0.00981041
PRTN3	rs10425544	19	836043	C	T	0.713	0.599	0.027	8.30E-110	3301	3301	1	0.0097477
SPARCL1	rs7681694	4	88462729	A	G	0.337	0.532	0.024	2.70E-105	3301	3544.5	2	0.0107046
ICOSLG	rs11558819	21	45656774	T	C	0.269	-0.576	0.026	3.50E-108	3301	3301	1	0.00972044
SERPINA4	rs10139745	14	95035374	A	G	0.221	0.617	0.028	4.90E-110	3301	3544.5	2	0.0104872
CNTN2	rs2071533	1	205012198	G	T	0.865	-0.771	0.035	6.90E-108	3301	3301	1	0.00961187
ASIP	rs62212171	20	32987687	T	C	0.89	-0.814	0.037	9.60E-98	5457	5457	1	0.0095872
SELP	rs6136	1	169563951	G	T	0.108	-0.807	0.037	3.00E-105	3301	3301	1	0.00942456
ADAMTS13	rs71503194	9	136298131	G	T	0.091	-0.872	0.04	4.40E-103	3301	3301	1	0.00941531
CCL14	rs9903158	17	34312337	C	T	0.056	-1.081	0.05	3.50E-104	3301	3301	1	0.0092619
FCN1	rs11103602	9	137854872	A	G	0.258	0.583	0.027	1.50E-106	3301	3301	1	0.00923865
DLK1	rs12881760	14	101176335	C	G	0.676	0.536	0.025	3.50E-101	3301	3301	1	0.00910972
THBS2	rs73043857	6	169624900	G	A	0.102	0.808	0.038	6.90E-99	3301	3301	1	0.00896141
IGFLR1	rs12459634	19	36230174	C	T	0.145	-0.701	0.033	5.80E-100	3301	3301	1	0.00894409
PLXNC1	rs115651556	12	94613898	A	G	0.014	-2.145	0.101	2.10E-100	3301	3544.5	2	0.0102735
CPB2	rs3742264	13	46648094	T	C	0.321	0.849	0.04	2.81E-83	3788	3788	1	0.00892956
NAAA	rs9996608	4	76848231	T	C	0.3	-0.549	0.026	3.90E-101	3301	3301	1	0.00883838
NFASC	rs6667532	1	204948659	G	A	0.105	0.823	0.039	4.10E-100	3301	3301	1	0.00882774
CCL23	rs712048	17	34326215	C	A	0.874	0.729	0.035	1.60E-94	3301	3301	1	0.00860195
CTSS	rs41271951	1	150737220	G	A	0.083	-0.861	0.042	7.10E-94	3301	3301	1	0.00833494
IL15RA	rs8177641	10	6016892	G	A	0.318	0.509	0.025	1.70E-91	3301	3301	1	0.00822242
FCRL6	rs58240276	1	159783559	T	C	0.19	-0.609	0.03	3.10E-92	3301	3301	1	0.00817443
QDPR	rs28719835	4	17520066	T	C	0.243	-0.567	0.028	1.00E-94	3301	3301	1	0.00813454
PENK	rs2670014	8	57376781	T	C	0.474	-0.465	0.023	1.30E-87	3301	3301	1	0.00810857
NELL1	rs61652119	11	20955270	A	G	0.049	1.11	0.055	1.30E-89	3301	3301	1	0.00808029
ESD	rs8192888	13	47362384	C	G	0.094	-0.806	0.04	9.80E-89	3301	3301	1	0.00805504
DKK 2	rs77571736	4	107864984	G	C	0.954	0.945	0.047	2.20E-83	5457	5457	1	0.00802048
SELL	rs4987358	1	169665551	T	G	0.274	-0.517	0.026	6.80E-87	3301	3301	1	0.00784591
TREML2	rs61998254	6	41166151	G	A	0.127	0.693	0.035	5.00E-86	3301	3301	1	0.0077798
PF4V1	rs941758	4	74718941	A	C	0.708	-0.494	0.025	6.60E-85	3301	3301	1	0.00774864
ENTPD5	rs57731447	14	74487521	A	G	0.059	-0.967	0.049	7.80E-87	3301	3301	1	0.00772896
WISP1	rs35472615	8	134197537	A	G	0.274	0.511	0.026	1.70E-84	3301	3301	1	0.00766625
CRHBP	rs6414971	5	76170674	T	A	0.741	-0.511	0.026	2.90E-79	5457	5457	1	0.00766625
HPSE	rs11732810	4	84230878	G	T	0.773	0.541	0.028	7.70E-78	5457	5457	1	0.00741102
ASPN	rs2516568	9	95187380	T	A	0.323	-0.472	0.025	2.30E-79	3301	3301	1	0.00707862
FAM3B	rs73226194	21	42721869	T	C	0.04	-1.15	0.061	3.90E-78	3301	3301	1	0.00705813
FUT10	rs2732317	8	33330687	C	A	0.612	-0.45	0.024	2.50E-77	3301	3301	1	0.00698216
PAM	rs257309	5	102418604	G	A	0.352	-0.466	0.025	3.80E-79	3301	3301	1	0.00690104
CD55	rs11580387	1	207418408	G	A	0.234	-0.521	0.028	4.70E-78	3301	3301	1	0.0068769
TGFBI	rs13159365	5	135389433	T	C	0.507	-0.446	0.024	5.00E-78	3301	3301	1	0.00685943
PATE4	rs875500	11	125698654	A	T	0.72	-0.482	0.026	1.00E-75	3301	3301	1	0.00682657
IL17RD	rs6776722	3	57142659	A	G	0.695	-0.462	0.025	3.40E-74	3301	3301	1	0.00678387
IL17RB	rs2232346	3	53892830	C	T	0.037	1.182	0.064	3.50E-77	3301	3301	1	0.00677567
F7	rs776905	13	113781942	C	A	0.113	-1.104	0.06	9.16E-65	3788	3788	1	0.00672566
CD8A	rs111976570	2	87014112	A	C	0.81	-0.567	0.031	7.30E-73	5457	5457	1	0.00664625
GPX7	rs1097234	1	53063559	A	C	0.175	0.563	0.031	1.60E-73	3301	3301	1	0.00655342
FCN2	rs57136797	9	137752540	T	A	0.164	-0.635	0.035	3.70E-72	3301	3301	1	0.00654021
B4GALT6	rs113222817	18	29216314	T	G	0.965	1.143	0.063	8.10E-71	5457	5457	1	0.00654021
CLEC1B	rs544605	12	10146707	T	C	0.781	-0.504	0.028	4.80E-70	5457	5457	1	0.00643828
CLPS	rs9380534	6	35751572	A	G	0.602	0.448	0.025	3.50E-71	3301	3301	1	0.00638154
C1QC	rs78865058	1	22944209	A	G	0.042	1.075	0.06	4.30E-71	3301	3301	1	0.00637918
PSMB1	rs756519	6	170850862	G	A	0.531	0.412	0.023	8.10E-67	5457	5457	1	0.00637662
CST3	rs911119	20	23612737	T	C	0.779	0.393	0.022	6.66E-73	3301	3301	1	0.00634172
FGL1	rs7815429	8	17737357	T	C	0.313	-0.446	0.025	3.30E-70	5457	5457	1	0.00632505
SERPINF1	rs62088172	17	1666253	T	C	0.345	-0.445	0.025	1.80E-70	3301	3301	1	0.0062969
KDR	rs34231037	4	55972946	G	A	0.034	-1.153	0.065	1.00E-70	3301	3301	1	0.00625371
TLR4;LY96	rs4986790	9	120475302	G	A	0.056	-0.902	0.051	2.80E-70	3301	3301	1	0.00621719
PSAPL1	rs10023470	4	7434456	G	A	0.184	0.548	0.031	2.60E-71	3301	3301	1	0.00621101
CFHR5	rs35662416	1	196967354	A	G	0.03	-1.2	0.068	3.00E-69	3301	3301	1	0.00618982
NTNG1	rs115668827	1	107678268	C	G	0.049	1.004	0.057	1.10E-70	3301	3301	1	0.00616682
HPGDS	rs1965049	4	95266204	G	A	0.621	0.44	0.025	1.30E-71	3301	3301	1	0.00615706
KIAA1549L	rs12792396	11	33417110	G	A	0.381	0.439	0.025	7.10E-68	5457	5457	1	0.00612927
SOD3	rs2695234	4	24804238	G	A	0.919	-0.736	0.042	1.10E-64	5457	5457	1	0.00610419
KDELC2	rs74911261	11	108357137	A	G	0.027	-1.314	0.075	1.10E-69	3301	3301	1	0.00610155
BPIFB1	rs2424961	20	31694060	T	C	0.579	-0.437	0.025	3.90E-71	3301	3301	1	0.00607389
BPI	rs1780617	20	36974157	G	A	0.122	-0.644	0.037	1.10E-67	3301	3301	1	0.00602247
FCGR3B	rs10919543	1	161508617	G	A	0.324	0.435	0.025	3.20E-67	3301	3301	1	0.00601875
NQO2	rs138616686	6	3003970	A	G	0.626	0.435	0.025	3.80E-64	5457	5457	1	0.00601875
REG3G	rs429694	2	79244586	A	C	0.794	-0.487	0.028	9.50E-63	5457	5457	1	0.00601384
GGH	rs10957266	8	63923764	C	T	0.071	0.799	0.046	1.20E-68	3301	3301	1	0.00599784
SCG3	rs1378892	15	51964865	C	T	0.764	0.486	0.028	1.00E-68	3301	3301	1	0.00598932
GSTA1	rs2290758	6	52662153	A	G	0.57	0.416	0.024	7.20E-69	3301	3301	1	0.005973
DPT	rs1018454	1	168697761	C	A	0.586	0.416	0.024	7.80E-67	3301	3301	1	0.005973
ANGPTL1	rs16853043	1	178545926	G	A	0.352	0.431	0.025	5.40E-68	3301	3301	1	0.00590922
KLK7	rs2739419	19	51484562	G	A	0.908	0.703	0.041	1.10E-66	3301	3301	1	0.00584557
NID2	rs1151582	14	52482768	T	C	0.457	-0.394	0.023	2.60E-64	3301	3301	1	0.00583479
B3GAT3	rs12794886	11	62383715	C	G	0.707	0.442	0.026	8.30E-63	3301	3301	1	0.00574678
SVEP1	rs61751937	9	113312231	C	G	0.03	1.185	0.07	5.20E-64	3301	3301	1	0.00569887
PCOLCE2	rs34516933	3	142603861	A	T	0.356	0.422	0.025	5.40E-66	3301	3301	1	0.0056664
CD7	rs116473040	17	80291652	A	G	0.955	0.962	0.057	1.30E-61	5457	5457	1	0.00566452
IL1R2	rs7561460	2	102617204	C	T	0.396	-0.403	0.024	6.20E-62	3301	3301	1	0.00560758
AMY1A	rs7538379	1	104067356	T	C	0.04	-1.04	0.062	4.90E-63	3301	3301	1	0.00559598
LGALS3	rs9323280	14	55801687	A	C	0.87	0.77	0.046	5.60E-62	3394	3394	1	0.00557274
GNMT	rs9471987	6	42944140	A	G	0.402	0.4	0.024	2.40E-61	5457	5457	1	0.00552486
CNTNAP2	rs10274393	7	145378588	C	G	0.711	-0.433	0.026	1.10E-60	3301	3301	1	0.00551641
ADAM23	rs1921673	2	207324282	G	A	0.685	0.432	0.026	3.20E-64	3301	3301	1	0.0054911
F13B	rs12116643	1	196973183	T	C	0.863	0.547	0.033	1.20E-60	5457	5457	1	0.00546508
NTM	rs2511504	11	131196396	T	C	0.588	-0.381	0.023	1.70E-58	5457	5457	1	0.00545817
CPQ	rs145746079	8	97832518	T	C	0.972	1.192	0.073	7.10E-58	5457	5457	1	0.00530429
QSOX1	rs12371	1	180163390	G	A	0.089	0.7	0.043	1.30E-60	3301	3301	1	0.00527222
CST7	rs6138458	20	24973769	A	G	0.227	-0.763	0.047	7.60E-53	3788	3788	1	0.00524325
IL16	rs4778639	15	81600451	G	T	0.091	-0.681	0.042	4.50E-59	3301	3301	1	0.00523056
INPP5B	rs61778082	1	38306356	T	C	0.865	0.547	0.034	2.10E-55	5457	5457	1	0.00514997
CPXM1	rs67159741	20	2780762	G	G	0.1	-0.643	0.04	1.00E-57	3301	3301	1	0.00514154
KLK8	rs74705037	19	51504808	A	G	0.045	0.929	0.058	6.30E-58	3301	3301	1	0.00510485
POFUT1	rs76143353	20	30815755	T	C	0.06	-0.8	0.05	9.30E-58	3301	3301	1	0.00509392
ERO1B	rs1254194	1	236399442	T	G	0.596	-0.382	0.024	1.90E-56	3301	3301	1	0.00504126
OAF	rs117554512	11	120098329	T	C	0.086	0.682	0.043	2.10E-56	3301	3301	1	0.0050059
FLRT3	rs11908097	20	14689146	C	T	0.251	0.444	0.028	2.50E-57	3301	3301	1	0.00500382
CD5L	rs2765501	1	157804648	G	A	0.608	-0.285	0.018	4.76E-54	3301	3301	1	0.00498888
FN1	rs1250258	2	216300185	C	T	0.255	-0.711	0.045	1.28E-49	3788	3788	1	0.004968
CTSB	rs1692819	8	11705448	A	G	0.292	0.425	0.027	5.20E-54	3301	3301	1	0.00493098
FRZB	rs288326	2	183703336	A	G	0.126	0.566	0.036	3.70E-55	3301	3301	1	0.00491944
SPON1	rs10832169	11	14066486	A	G	0.491	0.375	0.024	1.30E-55	3301	3301	1	0.00485909
LRRC15	rs57514363	3	194087927	G	T	0.113	0.593	0.038	5.90E-54	3301	3301	1	0.00484688
TREM1	rs3789204	6	41254741	G	T	0.693	-0.374	0.024	1.40E-54	5457	5457	1	0.00483333
PPIL1	rs12194408	6	36839598	G	C	0.03	-1.106	0.071	1.90E-55	3301	3301	1	0.00482971
KLK10	rs2569454	19	51523203	C	T	0.641	0.405	0.026	4.50E-54	5457	5457	1	0.00482938
DEFB1	rs2738176	8	6738228	A	T	0.365	-0.389	0.025	5.60E-55	3301	3301	1	0.00481894
WFDC1	rs400345	16	84328494	C	T	0.791	0.451	0.029	5.50E-54	5457	5457	1	0.00481384
CD300A	rs2272111	17	72469966	G	A	0.788	0.435	0.028	1.20E-52	5457	5457	1	0.00480398
KLK13	rs3760739	19	51538561	G	T	0.659	0.388	0.025	3.90E-54	5457	5457	1	0.00479431
RNASE4	rs12588573	14	21146584	T	C	0.224	-0.449	0.029	8.90E-54	3301	3301	1	0.00477144
UCMA	rs2093847	10	13276534	T	C	0.107	-0.586	0.038	3.10E-53	3301	3301	1	0.00473366
NCAM1	rs11214489	11	112975934	C	T	0.818	0.368	0.024	3.01E-54	3301	3301	1	0.00468021
PPIE	rs12086750	1	40210468	C	G	0.371	-0.383	0.025	4.80E-53	3301	3301	1	0.00467212
TIMP4	rs454615	3	12077010	C	T	0.831	0.49	0.032	1.70E-53	3301	3301	1	0.00466757
CFH	rs2274700	1	196682947	A	G	0.399	0.367	0.024	1.60E-51	3301	3301	1	0.00465493
NTN1	rs72809988	17	8986397	A	G	0.11	-0.579	0.038	1.60E-52	3301	3301	1	0.00462177
SIGLEC6	rs2124910	19	52025247	T	C	0.407	0.653	0.043	2.75E-46	3788	3788	1	0.00459114
CD14	rs3138074	5	140015932	A	T	0.777	0.332	0.022	9.22E-53	3301	3301	1	0.00453406
PDCD1LG2	rs16923189	9	5510644	G	A	0.298	0.388	0.026	7.90E-51	3301	3301	1	0.00443422
FCN3	rs2474283	1	27716213	T	C	0.933	0.716	0.048	1.10E-48	5457	5457	1	0.00443042
CAPG	rs143448563	2	85610023	A	G	0.983	1.4	0.094	1.00E-48	5457	5457	1	0.0044168
QSOX2	rs10858248	9	139108324	G	A	0.502	-0.357	0.024	1.50E-50	3301	3301	1	0.00440582
GAA	rs12450199	17	78076592	A	C	0.647	0.369	0.025	1.40E-48	5457	5457	1	0.00433825
PGLYRP2	rs55866012	19	15578008	T	G	0.842	0.486	0.033	1.80E-47	5457	5457	1	0.00431912
NPW	rs35327014	16	2076202	G	A	0.231	-0.427	0.029	1.60E-49	3301	3301	1	0.00431728
IFI16	rs72709516	1	159004851	T	C	0.044	0.852	0.058	2.60E-49	3301	3301	1	0.00429717
CBR1	rs16993864	21	37446599	A	C	0.022	-1.215	0.083	6.60E-49	3301	3301	1	0.00426746
TNFSF12;T	rs12941509	17	7448288	G	C	0.279	0.393	0.027	2.20E-49	3301	3301	1	0.0042194
CRTAC1	rs588061	10	99642731	C	T	0.529	0.346	0.024	8.60E-47	5457	5457	1	0.0041396
CCL18	rs9904601	17	34372006	A	G	0.117	0.863	0.06	2.48E-43	3788	3788	1	0.00412056
PPT1	rs7533094	1	40559686	A	G	0.042	-0.862	0.06	2.30E-46	3301	3301	1	0.00411105
CST5	rs6138152	20	23850130	G	A	0.196	0.718	0.05	1.76E-42	3788	3788	1	0.00410725
VEGFC	rs41278571	4	177650866	T	C	0.01	1.742	0.122	1.30E-46	3301	3301	1	0.00406106
RELT	rs7952686	11	73128503	T	C	0.204	0.413	0.029	3.10E-45	3301	3301	1	0.00403995
SERPINE2	rs68066031	2	224880498	C	T	0.258	-0.426	0.03	1.10E-46	3301	3301	1	0.0040166
IL5RA	rs77400868	3	3150964	G	A	0.139	0.51	0.036	6.80E-45	3301	3301	1	0.00399784
PREP	rs1051484	6	105726036	C	T	0.835	-0.453	0.032	7.00E-44	5457	5457	1	0.00399199
PDLIM4	rs6864922	5	131616290	C	T	0.937	0.676	0.048	1.50E-44	5457	5457	1	0.00395113
MGP	rs7135211	12	15052758	G	A	0.622	0.265	0.019	3.62E-44	3301	3301	1	0.0038755
MAN2B2	rs2301790	4	6600012	G	A	0.484	0.334	0.024	1.00E-44	3301	3301	1	0.00385853
XCL1	rs4656599	1	168503386	T	C	0.19	0.43	0.031	2.00E-43	3301	3301	1	0.00383332
RPN1	rs2712417	3	128345179	G	A	0.618	-0.345	0.025	3.10E-44	3301	3301	1	0.00379435
CCL3L1	rs2015086	17	34391617	G	A	0.131	0.496	0.036	3.10E-42	3301	3301	1	0.00378218
RNPEP	rs59698324	1	201965855	C	T	0.725	0.371	0.027	3.80E-42	5457	5457	1	0.00376195
FGF2	rs308403	4	123757748	T	C	0.319	-0.59	0.043	5.80E-39	3788	3788	1	0.00375115
NCAM2	rs2826851	21	22835946	A	G	0.733	-0.37	0.027	1.70E-42	5457	5457	1	0.00374178
EPHB2	rs6687487	1	23061551	A	G	0.08	-0.612	0.045	1.30E-42	3301	3301	1	0.00368557
MANSC1	rs2160588	12	12487447	A	G	0.12	0.502	0.037	8.70E-42	3301	3301	1	0.00366807
FKBP7	rs10930831	2	179303976	G	C	0.768	-0.365	0.027	2.00E-39	5457	5457	1	0.0036417
ACP5	rs79061565	19	11698659	G	C	0.123	-0.485	0.036	1.60E-40	3301	3301	1	0.00361689
GLRX2	rs148212596	1	193074511	G	A	0.02	1.184	0.088	3.50E-41	3301	3301	1	0.00360743
ANG	rs17114671	14	21155270	C	T	0.119	0.806	0.06	1.92E-38	3788	3788	1	0.00359611
CD59	rs2273121	11	33757770	A	G	0.252	-0.362	0.027	4.70E-41	3301	3301	1	0.00358229
VIT	rs10490666	2	36932493	T	A	0.304	0.347	0.026	1.90E-39	3301	3301	1	0.00354975
ROR1	rs1408416	1	64614495	T	G	0.162	-0.44	0.033	1.80E-40	3301	3301	1	0.00354296
RMDN1	rs11781016	8	87529297	C	A	0.489	0.317	0.024	8.30E-39	3301	3301	1	0.00347707
PTGR1	rs112140014	9	114325849	G	C	0.952	-0.726	0.055	2.10E-38	5457	5457	1	0.0034727
CSF2RB	rs1534881	22	37329448	A	G	0.446	-0.316	0.024	2.60E-38	3301	3301	1	0.00345524
CST1	rs6114248	20	23711882	A	G	0.315	0.564	0.043	5.05E-37	3788	3788	1	0.00342894
PDCD5	rs4499344	19	33073431	A	G	0.291	0.354	0.027	1.20E-39	3301	3301	1	0.00342625
NAGK	rs7606102	2	71276399	G	A	0.17	-0.432	0.033	6.00E-39	3301	3301	1	0.00341573
NAGPA	rs12599777	16	5079466	G	A	0.204	-0.418	0.032	1.40E-39	3301	3301	1	0.00340097
DPEP1	rs423135	16	89740873	G	A	0.429	-0.313	0.024	5.50E-39	5457	5457	1	0.00339017
RIDA	rs1462977	8	99115359	G	A	0.323	-0.339	0.026	2.20E-39	3301	3301	1	0.00338851
DPP7	rs10747049	9	140008750	C	G	0.75	0.364	0.028	2.30E-39	3301	3301	1	0.00336861
HDHD2	rs75228657	18	44741063	G	A	0.052	0.702	0.054	4.70E-38	3301	3301	1	0.00336861
IGFBP7	rs1718849	4	57942323	C	T	0.766	-0.363	0.028	5.20E-38	3301	3301	1	0.00335019
HGFAC	rs1203119	4	3406952	A	G	0.082	-0.985	0.076	1.10E-35	3788	3788	1	0.00334826
B4GALT2	rs2286241	1	44440769	C	G	0.056	-0.673	0.052	3.00E-38	3301	3301	1	0.00333888
ACHE	rs4727469	7	100509163	C	T	0.524	-0.297	0.023	7.50E-37	5457	5457	1	0.00332385
COCH	rs34907608	14	31330413	A	G	0.119	0.476	0.037	1.00E-38	3301	3301	1	0.00329917
CHST9	rs9952639	18	24709604	C	G	0.318	0.333	0.026	7.20E-37	3301	3301	1	0.00327001
AMY2B	rs17014913	1	104105635	A	G	0.839	0.433	0.034	3.20E-36	5457	5457	1	0.00323327
SIGLEC7	rs140185670	19	51646140	C	G	0.08	-0.609	0.048	1.70E-36	3301	3301	1	0.00320912
ALPP	rs12478529	2	233286654	C	T	0.778	-0.354	0.028	2.50E-35	5457	5457	1	0.00318665
REG1A	rs11126696	2	79323888	G	A	0.612	0.265	0.021	2.18E-40	3301	3301	1	0.0031747
PI3	rs16989763	20	43779963	C	T	0.195	0.376	0.03	1.60E-35	3301	3301	1	0.00313185
RTN4R	rs75766	22	20174853	A	C	0.748	-0.35	0.028	4.80E-35	3301	3301	1	0.00311526
CFI	rs7439493	4	110656730	A	G	0.416	0.312	0.025	8.90E-37	3301	3301	1	0.00310533
DKK 3	rs11022114	11	12038874	A	G	0.328	0.336	0.027	6.50E-36	3301	3301	1	0.00308772
GKN2	rs13008230	2	69154583	T	G	0.973	0.942	0.076	2.70E-34	5457	5457	1	0.00306318
IMPAD1	rs112433249	8	57876576	T	C	0.992	1.685	0.136	1.70E-34	5457	5457	1	0.0030607
KIAA1161	rs10972076	9	34356359	T	C	0.625	0.308	0.025	2.20E-34	3301	3301	1	0.00302646
MMP1	rs471994	11	102697731	G	A	0.65	0.32	0.026	2.30E-35	3394	3394	1	0.00302044
FCER2	rs12973524	19	7758263	A	G	0.484	-0.306	0.025	5.80E-36	3301	3301	1	0.0029874
NPTX1	rs62069681	17	78624702	C	T	0.093	0.514	0.042	7.60E-35	3301	3301	1	0.00298647
CYTL1	rs62291616	4	5052063	T	C	0.814	-0.354	0.029	1.20E-32	5457	5457	1	0.00297131
PRDX6	rs6671141	1	173446934	T	G	0.85	-0.413	0.034	8.80E-33	5457	5457	1	0.00294234
C1QL1	rs9915692	17	43034207	A	G	0.463	-0.279	0.023	3.40E-32	5457	5457	1	0.00293431
ECH1	rs4802890	19	39304402	G	A	0.92	-0.533	0.044	2.20E-33	5457	5457	1	0.00292622
SHANK3	rs6010042	22	51098764	G	A	0.748	-0.327	0.027	6.60E-33	5457	5457	1	0.002925
SPINK2	rs11941335	4	57689460	T	C	0.021	1	0.083	2.20E-33	3301	3301	1	0.00289478
SCARF1	rs8071756	17	1574342	G	A	0.224	0.59	0.049	9.36E-31	3788	3788	1	0.00289124
IL12B	rs4921484	5	158769753	C	T	0.678	0.312	0.026	7.20E-33	3301	3301	1	0.00287173
LECT2	rs248160	5	135293512	T	C	0.67	-0.312	0.026	3.70E-33	5457	5457	1	0.00287173
SHMT1	rs8067462	17	18263571	C	A	0.607	-0.3	0.025	1.00E-31	5457	5457	1	0.00287173
CST2	rs6114248	20	23711882	A	G	0.315	0.515	0.043	4.39E-31	3788	3788	1	0.00286064
DUSP13	rs6480771	10	76861680	C	T	0.415	-0.299	0.025	8.30E-34	3301	3301	1	0.00285267
GP6	rs1654439	19	55553647	T	G	0.17	-0.657	0.055	6.59E-31	3788	3788	1	0.00284576
OBP2B	rs4454354	9	136089529	C	T	0.786	0.358	0.03	2.70E-33	3301	3301	1	0.00284
CST4	rs7270028	20	23681073	C	A	0.896	0.465	0.039	1.80E-31	5457	5457	1	0.00283513
SMPD1	rs1050239	11	6415463	G	A	0.715	0.31	0.026	1.80E-31	5457	5457	1	0.00283513
THSD1	rs41292808	13	52971517	T	C	0.027	0.906	0.076	5.50E-33	3301	3301	1	0.00283417
PRSS22	rs3810801	16	2892370	A	C	0.333	0.307	0.026	3.70E-33	3301	3301	1	0.00278068
GFRA2	rs15881	8	21550768	C	A	0.456	0.295	0.025	4.10E-33	3301	3301	1	0.00277707
CTGF	rs9388953	6	132297509	G	A	0.789	0.353	0.03	8.70E-32	5457	5457	1	0.00276144
FAM3D	rs3749290	3	58652292	T	G	0.096	-0.481	0.041	2.00E-31	3301	3301	1	0.0027451
ART3	rs4859610	4	77000441	G	A	0.774	-0.338	0.029	3.00E-32	3301	3301	1	0.0027095
CCL4	rs6607368	17	34819136	A	C	0.8	0.51	0.044	6.30E-31	3394	3394	1	0.00267978
DNAJC30	rs73702564	7	73084816	T	C	0.039	0.718	0.062	6.90E-31	3301	3301	1	0.00267505
DCBLD2	rs9864010	3	98678173	A	G	0.055	-0.62	0.054	6.60E-31	3301	3301	1	0.00262956
CD274	rs1411262	9	5459419	C	T	0.736	0.31	0.027	1.70E-29	5457	5457	1	0.00262956
MPO	rs34097845	17	56358429	T	C	0.067	-0.574	0.05	8.50E-31	3301	3301	1	0.00262888
TCN1	rs34528912	11	59631535	T	C	0.042	-0.711	0.062	4.60E-30	3301	3301	1	0.00262328
HPX	rs7935957	11	6450200	A	T	0.788	-0.252	0.022	5.06E-30	3301	3301	1	0.00261726
SMOC1	rs1958078	14	70354858	C	A	0.834	0.377	0.033	1.80E-30	3301	3301	1	0.00260347
BTNL8	rs7721375	5	180439650	C	T	0.507	0.273	0.024	1.40E-28	5457	5457	1	0.00258113
TIMP2	rs2376999	17	76890864	A	G	0.884	0.418	0.037	3.30E-29	5457	5457	1	0.00254608
QPCT	rs13027919	2	37567636	C	T	0.538	0.271	0.024	3.50E-28	5457	5457	1	0.00254355
C4BPA	rs11120218	1	207278451	G	A	0.889	-0.429	0.038	1.50E-28	5457	5457	1	0.00254256
MGAT4B	rs73351608	5	179232064	T	A	0.022	-0.959	0.085	2.20E-29	3301	3301	1	0.00253937
SECTM1	rs4789763	17	80289284	G	A	0.493	0.281	0.025	3.80E-30	3301	3301	1	0.00252038
TPSAB1;TP SB2	rs4984778	16	1297516	C	G	0.285	0.517	0.046	2.68E-27	3788	3788	1	0.00252
B4GALT1	rs7019909	9	33113322	T	C	0.103	0.448	0.04	7.90E-29	3301	3301	1	0.00250252
FGFBP3	rs11186737	10	93666349	C	T	0.746	0.302	0.027	5.90E-28	5457	5457	1	0.00249592
MANF	rs1552074	3	51408051	T	C	0.859	0.391	0.035	2.60E-28	5457	5457	1	0.0024898
NMRAL1	rs11557236	16	4519439	A	G	0.082	-0.491	0.044	1.50E-28	3301	3301	1	0.00248432
NUDT9	rs28696943	4	88310135	G	A	0.167	-0.357	0.032	2.30E-28	3301	3301	1	0.00248306
FAM171B	rs10931256	2	187685195	C	T	0.216	-0.334	0.03	1.10E-29	3301	3301	1	0.00247289
ITIH5	rs7909223	10	7700709	G	A	0.748	0.322	0.029	2.00E-29	3301	3301	1	0.00245967
NPPB	rs198379	1	11915467	T	C	0.608	-0.266	0.024	1.58E-41	3301	3301	1	0.00245078
GPNMB	rs2268748	7	23313171	C	T	0.041	0.687	0.062	1.20E-28	3301	3301	1	0.0024496
ATP1B2	rs1642762	17	7554772	T	C	0.587	-0.288	0.026	1.50E-29	3301	3301	1	0.00244796
QPCTL	rs17850756	19	46206262	A	G	0.328	-0.288	0.026	1.60E-28	3301	3301	1	0.00244796
NUDT12	rs74692061	5	102903643	G	A	0.157	-0.376	0.034	2.80E-28	3301	3301	1	0.00243998
SPOCK3	rs17599599	4	167961738	A	G	0.028	0.848	0.077	1.50E-28	3301	3301	1	0.00241985
CCDC126	rs227934	7	23627287	T	C	0.479	-0.275	0.025	6.90E-29	3301	3301	1	0.00241416
SULT2A1	rs296369	19	48371853	C	T	0.843	0.36	0.033	1.70E-27	5457	5457	1	0.00237451
PPID	rs8396	4	159630817	C	T	0.286	0.501	0.046	3.40E-26	3788	3788	1	0.0023668
TMEM106B	rs10950398	7	12264871	A	G	0.393	-0.272	0.025	6.10E-27	5457	5457	1	0.0023619
RECQL	rs144436375	12	21515500	A	C	0.98	-0.935	0.086	9.00E-27	5457	5457	1	0.00235847
NRP1	rs2506149	10	33480713	T	C	0.358	-0.281	0.026	6.90E-28	3301	3301	1	0.00233068
RSPO3	rs2489623	6	127455821	C	A	0.535	0.27	0.025	3.60E-28	3301	3301	1	0.00232737
CD300E	rs8081669	17	72614611	G	A	0.551	0.27	0.025	4.20E-27	5457	5457	1	0.00232737
CLIC5	rs35822882	6	45916999	T	G	0.034	-0.734	0.068	7.40E-27	3301	3301	1	0.00232484
TGFB1	rs1800470	19	41858921	A	G	0.621	0.259	0.024	4.50E-26	5457	5457	1	0.00232379
EFEMP1	rs3791679	2	56096892	A	G	0.761	-0.226	0.021	2.49E-26	3301	3301	1	0.00231102
NOG	rs79084672	17	54856140	G	A	0.012	1.237	0.115	8.70E-27	3301	3301	1	0.00230871
POMGNT2	rs729654	3	43147652	T	C	0.473	-0.256	0.024	9.30E-27	3301	3301	1	0.00227039
FCRL1	rs4971155	1	157779182	A	T	0.506	-0.256	0.024	6.30E-26	3301	3301	1	0.00227039
CDON	rs3740909	11	125889526	T	C	0.073	-0.829	0.078	4.42E-25	3788	3788	1	0.00225408
CD300C	rs62087214	17	72467626	G	A	0.039	-0.679	0.064	1.70E-26	3301	3301	1	0.00224612
CTSD	rs111693235	11	1770224	C	G	0.71	0.35	0.033	2.00E-26	3394	3394	1	0.00224472
LGALS2	rs5756729	22	37961353	T	C	0.593	-0.275	0.026	2.20E-26	3301	3301	1	0.00223243
IL11RA	rs11575578	9	34656479	A	G	0.068	0.507	0.048	4.40E-26	3301	3301	1	0.00222636
CD48	rs12124234	1	160675269	C	G	0.405	0.264	0.025	1.10E-25	3301	3301	1	0.00222531
IL18RAP	rs6543140	2	103074274	T	G	0.301	0.485	0.046	1.01E-24	3788	3788	1	0.00221837
MMP9	rs2250889	20	44642406	C	G	0.953	-0.622	0.059	2.10E-26	3301	3301	1	0.0022179
CHRDL2	rs11607100	11	74414919	T	C	0.042	-0.642	0.061	5.80E-26	3301	3301	1	0.00221044
F11	rs2289252	4	187207381	T	C	0.413	0.442	0.042	4.60E-25	3788	3788	1	0.00221012
IGLL1	rs139571703	22	23915620	T	C	0.037	-0.726	0.069	9.80E-26	3301	3301	1	0.00220925
CP	rs34004251	3	148929951	T	A	0.812	-0.263	0.025	4.91E-25	3301	3301	1	0.00220852
ADH5	rs1453873	4	100022571	C	T	0.742	-0.284	0.027	2.50E-25	5457	5457	1	0.0022079
RFESD	rs77881626	5	95017852	G	T	0.048	-0.597	0.057	2.10E-25	3301	3301	1	0.00218916
NT5C	rs78625720	17	73140941	A	G	0.03	-0.753	0.072	1.20E-25	3301	3301	1	0.00218276
APOH	rs1801690	17	64208285	C	G	0.943	0.552	0.053	6.50E-25	5457	5457	1	0.00216479
OAS1	rs4767027	12	113359157	C	T	0.654	-0.27	0.026	6.20E-26	3301	3301	1	0.00215216
AKR7A2	rs144376466	1	19600538	C	T	0.912	0.436	0.042	1.90E-24	5457	5457	1	0.00215065
ISG15	rs1891906	1	950243	C	A	0.386	0.259	0.025	1.40E-24	3301	3301	1	0.00214199
UNC5C	rs57091121	4	96444053	T	A	0.337	0.269	0.026	1.90E-25	3301	3301	1	0.00213628
GPC1	rs4074478	2	241446340	T	C	0.106	0.424	0.041	4.30E-25	3301	3301	1	0.00213435
ST3GAL1	rs9643300	8	134503148	T	C	0.563	-0.257	0.025	1.40E-25	3301	3301	1	0.00210911
GLTPD2	rs34460487	17	4685228	A	G	0.346	0.267	0.026	6.80E-25	3301	3301	1	0.0021047
VWA2	rs11595697	10	115905775	C	T	0.903	-0.431	0.042	7.80E-25	5457	5457	1	0.00210171
CREB3L4	rs4845586	1	153942597	G	T	0.47	0.256	0.025	7.10E-25	3301	3301	1	0.00209276
SWAP70	rs415895	11	9769562	G	C	0.65	-0.266	0.026	3.50E-25	3301	3301	1	0.002089
APCS	rs71632673	1	159536213	A	C	0.023	-0.837	0.082	1.90E-24	3301	3301	1	0.00207945
EGF	rs11568972	4	110889007	C	A	0.337	0.265	0.026	3.10E-25	3301	3301	1	0.00207335
FAM151A	rs11206397	1	55097068	T	A	0.327	0.265	0.026	2.60E-24	3301	3301	1	0.00207335
PDGFD	rs7950273	11	104031598	G	C	0.288	-0.275	0.027	1.40E-24	3301	3301	1	0.00207046
LMNB1	rs36105360	5	126161690	T	C	0.025	0.804	0.079	2.20E-24	3301	3301	1	0.00206723
TIE1	rs2275180	1	43773033	G	A	0.623	0.254	0.025	4.80E-24	3301	3301	1	0.00206026
CNTN4	rs163352	3	3098041	C	G	0.813	-0.325	0.032	2.70E-24	3301	3301	1	0.00205874
SPATA20	rs9890200	17	48624523	C	A	0.376	-0.253	0.025	8.70E-24	3301	3301	1	0.0020441
LMAN2L	rs2271893	2	97405440	A	G	0.323	0.263	0.026	4.40E-24	3301	3301	1	0.00204224
SIRPG	rs6043409	20	1616206	G	A	0.652	0.263	0.026	8.10E-24	3301	3301	1	0.00204224
CEL	rs8193016	9	135917744	T	C	0.035	0.685	0.068	8.30E-24	3301	3301	1	0.00202541
C1RL	rs6488561	12	7246894	G	A	0.695	0.27	0.027	5.60E-24	5457	5457	1	0.00199601
MMP10	rs17860955	11	102649482	C	T	0.022	-0.869	0.087	1.40E-23	3301	3301	1	0.00199143
AKR1C1	rs145648894	10	5009739	G	T	0.111	0.389	0.039	3.80E-23	3301	3301	1	0.00198581
HDGF	rs4399146	1	156713558	G	A	0.717	0.269	0.027	3.20E-23	5457	5457	1	0.00198128
CLMP	rs35483681	11	123045730	T	C	0.554	0.249	0.025	4.50E-24	3301	3301	1	0.0019801
EMILIN3	rs61739314	20	39990377	C	G	0.033	-0.686	0.069	3.60E-23	3301	3301	1	0.00197298
PGM1	rs1126728	1	64097432	T	C	0.228	0.287	0.029	2.80E-23	3301	3301	1	0.00195501
LRPAP1	rs78770234	4	3496683	A	G	0.033	-0.682	0.069	3.60E-23	3301	3301	1	0.00195008
RNASE2	rs56204594	14	21433367	C	A	0.464	0.237	0.024	3.20E-22	3301	3301	1	0.00194652
CRLF1	rs2238647	19	18710535	G	A	0.778	-0.286	0.029	1.40E-22	5457	5457	1	0.00194143
CNTN1	rs1838343	12	41196230	C	T	0.58	0.207	0.021	6.45E-24	3301	3301	1	0.0019395
GRN	rs5848	17	42430244	T	C	0.287	-0.276	0.028	8.10E-23	3301	3301	1	0.0019395
LRRN1	rs6801789	3	3807592	C	T	0.354	0.246	0.025	2.30E-22	3301	3301	1	0.00193277
GFRA1	rs10885877	10	117966090	G	C	0.295	0.265	0.027	2.00E-22	3301	3301	1	0.00192291
UGT1A6	rs111741722	2	234665983	A	G	0.681	0.265	0.027	1.80E-22	5457	5457	1	0.00192291
TEK	rs35030851	9	27197486	T	G	0.047	0.557	0.057	1.40E-22	3301	3301	1	0.00190617
IL6ST	rs11574765	5	55278967	G	A	0.116	0.381	0.039	1.00E-22	3301	3301	1	0.00190512
POSTN	rs962462	13	38089171	A	G	0.714	0.244	0.025	8.60E-23	5457	5457	1	0.00190153
TPST2	rs2283824	22	26924456	A	G	0.417	0.243	0.025	6.00E-23	3301	3301	1	0.001886
VWC2	rs79259707	7	49812564	C	A	0.868	0.34	0.035	1.30E-22	5457	5457	1	0.00188379
WISP2	rs1061098	20	43356156	C	T	0.663	0.213	0.022	4.80E-21	5457	5457	1	0.00187124
IL18	rs75649625	11	112052194	G	A	0.76	0.29	0.03	1.40E-21	3394	3394	1	0.0018654
IL7R	rs11957503	5	35883176	G	T	0.437	0.425	0.044	1.92E-21	3788	3788	1	0.00186249
ARFIP1	rs4619875	4	153701130	T	C	0.404	0.239	0.025	6.60E-22	3301	3301	1	0.00182454
MMP8	rs35231465	11	102584135	A	G	0.023	-0.583	0.061	2.26E-21	3301	3301	1	0.00182354
F10	rs547138	13	113792170	A	T	0.615	0.258	0.027	5.80E-22	3301	3301	1	0.00182284
IL12RB2	rs12566098	1	67889571	G	C	0.688	0.257	0.027	6.00E-22	3301	3301	1	0.00180877
NPTXR	rs12628473	22	39240717	A	G	0.987	-1.013	0.107	4.60E-21	5457	5457	1	0.00178938
ADAM19	rs7728609	5	156935524	C	T	0.675	0.246	0.026	1.20E-21	5457	5457	1	0.00178721
PCSK9	rs191448950	1	55584844	G	A	0.989	1.069	0.113	8.40E-21	5457	5457	1	0.0017867
LHB	rs75287599	19	49517140	T	C	0.078	-0.434	0.046	2.40E-21	3301	3301	1	0.00177714
CREG1	rs7513428	1	167515272	C	T	0.836	-0.311	0.033	1.40E-20	3301	3301	1	0.00177318
MAPK13	rs12210904	6	36098191	A	C	0.289	0.254	0.027	1.50E-21	3301	3301	1	0.00176686
SCARF2	rs738086	22	20775556	T	G	0.811	0.3	0.032	4.80E-21	3301	3301	1	0.00175473
LILRA4	rs2241384	19	54849942	A	G	0.17	-0.309	0.033	3.40E-21	3301	3301	1	0.00175048
RETN	rs34124816	19	7733676	C	A	0.038	-0.608	0.065	4.40E-21	3301	3301	1	0.00174683
CXCL11	rs10031452	4	76924933	C	T	0.529	-0.233	0.025	2.40E-21	3301	3301	1	0.00173423
C1QTNF5	rs2248863	11	119207341	A	G	0.142	0.326	0.035	3.50E-21	3301	3301	1	0.00173211
ALDH3A1	rs887241	17	19645938	C	A	0.662	0.242	0.026	7.80E-21	3301	3301	1	0.00172967
CA13	rs17741049	8	86198253	T	C	0.068	-0.744	0.08	7.92E-20	3788	3788	1	0.00172681
SERPINA11	rs17090881	14	94913209	C	A	0.835	0.288	0.031	1.80E-20	5457	5457	1	0.00172323
LY9	rs540254	1	160767737	C	T	0.353	0.417	0.045	7.78E-20	3788	3788	1	0.00171448
IDO1	rs7010461	8	39781444	T	C	0.334	0.25	0.027	2.50E-20	3301	3301	1	0.00171174
CDNF	rs61738953	10	14862082	G	C	0.042	-0.629	0.068	2.50E-20	3301	3301	1	0.00170833
EPHB6	rs7789303	7	142552547	A	G	0.725	0.239	0.026	6.30E-20	5457	5457	1	0.00168712
MXRA7	rs9900613	17	74674857	T	C	0.431	-0.229	0.025	1.90E-20	3301	3301	1	0.0016753
PRCP	rs2229437	11	82564294	G	T	0.181	0.291	0.032	2.80E-20	3301	3301	1	0.0016512
LEAP2	rs57880964	5	132210674	G	C	0.838	-0.3	0.033	4.10E-19	5457	5457	1	0.00165017
SPOCK2	rs1245540	10	73849752	T	C	0.449	0.218	0.024	3.30E-19	3301	3301	1	0.00164742
SLITRK3	rs62282371	3	164911694	T	G	0.887	0.345	0.038	3.70E-19	5457	5457	1	0.00164583
CRTAM	rs2370794	11	122714782	A	G	0.668	-0.236	0.026	5.80E-20	5457	5457	1	0.0016451
FLT4	rs34221241	5	180057293	C	T	0.104	-0.363	0.04	1.50E-19	3301	3301	1	0.0016444
PLAU	rs2227551	10	75669190	T	G	0.716	-0.244	0.027	5.40E-20	3301	3301	1	0.0016307
COL15A1	rs41305481	9	101767385	G	A	0.302	0.244	0.027	1.90E-19	3301	3301	1	0.0016307
CRISPLD2	rs12921670	16	84838761	A	G	0.257	0.262	0.029	5.40E-19	3301	3301	1	0.00162978
APOA1	rs75507001	11	116577694	C	A	0.957	0.55	0.061	1.70E-19	5457	5457	1	0.00162327
CA10	rs117399000	17	50213731	A	G	0.037	-0.594	0.066	3.00E-19	3301	3301	1	0.00161738
MFGE8	rs1961839	15	89467454	A	G	0.397	-0.225	0.025	3.40E-19	3301	3301	1	0.00161738
CAPN1;CAP NS1	rs10895987	11	64904908	T	C	0.226	-0.459	0.051	1.01E-18	3788	3788	1	0.00161738
EDAR	rs6750059	2	109611097	C	T	0.249	-0.44	0.049	1.34E-18	3788	3788	1	0.00161006
B3GLCT	rs9544399	13	31885907	A	G	0.791	0.278	0.031	1.60E-19	5457	5457	1	0.00160582
CNTN5	rs1461672	11	99175378	T	C	0.061	0.734	0.082	2.24E-18	3788	3788	1	0.00159992
RET	rs2795507	10	43352894	C	T	0.796	-0.277	0.031	1.10E-19	3301	3301	1	0.00159431
APOL1	rs71314970	22	36638705	T	C	0.106	-0.366	0.041	3.50E-19	3301	3301	1	0.00159123
PEAR1	rs12137505	1	156883546	G	A	0.406	-0.223	0.025	8.10E-19	3301	3301	1	0.0015888
SHBG	rs858519	17	7531965	T	C	0.474	-0.214	0.024	2.30E-18	5457	5457	1	0.00158761
PPA1	rs10823500	10	72005190	G	A	0.371	0.401	0.045	1.53E-18	3788	3788	1	0.00158564
TPST1	rs313829	7	65552497	G	A	0.689	0.231	0.026	1.10E-18	3301	3301	1	0.00157624
SFRP4	rs75474297	7	37973124	T	A	0.855	-0.302	0.034	2.10E-18	5457	5457	1	0.00157544
S100A4	rs58056804	1	153524706	A	G	0.05	0.505	0.057	4.50E-19	3301	3301	1	0.00156741
TEPSIN	rs61745945	17	79205421	A	G	0.016	-0.877	0.099	5.90E-19	3301	3301	1	0.00156703
FAM20A	rs929477	17	66655816	A	G	0.094	-0.372	0.042	5.10E-19	3301	3301	1	0.00156652
IL1RL2	rs2228139	2	102781649	G	C	0.069	-0.425	0.048	1.60E-18	3301	3301	1	0.00156547
TMEM132D	rs61943549	12	130092229	T	C	0.948	-0.486	0.055	1.00E-18	5457	5457	1	0.00155919
CPB1	rs13318853	3	148562399	A	G	0.232	0.256	0.029	2.00E-18	3301	3301	1	0.0015561
PTN	rs1431093	7	137016297	A	C	0.419	0.22	0.025	7.90E-19	3301	3301	1	0.00154641
WARS	rs941923	14	100813077	C	T	0.766	0.255	0.029	6.60E-18	5457	5457	1	0.00154399
PKDCC	rs893812	2	42303114	C	T	0.731	-0.236	0.027	5.60E-18	5457	5457	1	0.00152568
HS6ST1	rs34827544	2	129084425	T	C	0.157	-0.305	0.035	1.90E-18	3301	3301	1	0.00151647
CTSF	rs1791679	11	66337874	A	C	0.289	0.235	0.027	2.50E-18	3301	3301	1	0.0015128
NTN4	rs17288108	12	96131895	G	A	0.182	-0.278	0.032	7.20E-18	3301	3301	1	0.00150718
RAB6B	rs9813363	3	133604743	G	A	0.825	0.278	0.032	1.20E-17	5457	5457	1	0.00150718
C7	rs429017	5	41263091	A	G	0.253	0.433	0.05	9.04E-18	3788	3788	1	0.00149767
TMEM132C	rs11059617	12	128757909	T	A	0.335	-0.225	0.026	2.20E-18	3301	3301	1	0.00149554
RGMB	rs1563317	5	97768486	G	A	0.553	0.216	0.025	1.20E-18	3301	3301	1	0.00149077
MFAP2	rs4920605	1	17315425	A	G	0.554	0.207	0.024	1.30E-17	3301	3301	1	0.0014856
NCR1	rs143981324	19	55419632	T	C	0.904	0.362	0.042	1.30E-17	5457	5457	1	0.00148355
IL23R	rs11581607	1	67707690	A	G	0.067	-0.42	0.049	1.20E-17	3301	3301	1	0.00146723
HSPB1	rs13236526	7	75913642	A	G	0.7	0.36	0.042	1.10E-17	3394	3394	1	0.00146723
ARSB	rs13159135	5	78196689	C	G	0.434	-0.214	0.025	5.90E-18	3301	3301	1	0.00146333
TXNDC15	rs78165052	5	134250596	C	T	0.875	-0.307	0.036	3.60E-17	5457	5457	1	0.00145235
RNASE1	rs17254387	14	21280678	A	G	0.688	0.23	0.027	3.00E-17	3301	3301	1	0.0014492
C3	rs163494	19	6724340	C	T	0.805	0.264	0.031	3.40E-17	5457	5457	1	0.00144839
COL6A1	rs434206	21	47366802	T	G	0.594	-0.212	0.025	5.20E-17	3301	3301	1	0.00143614
SPINK1	rs4705205	5	147218813	T	C	0.573	-0.212	0.025	1.50E-17	5457	5457	1	0.00143614
PCOLCE	rs9801017	7	100236202	A	G	0.636	0.211	0.025	1.00E-16	3301	3301	1	0.00142264
SEMA3G	rs2016575	3	52477080	C	T	0.816	-0.269	0.032	1.90E-17	3301	3301	1	0.00141131
FLRT2	rs17796777	14	85806774	C	A	0.286	-0.235	0.028	1.50E-17	3301	3301	1	0.00140682
ESAM	rs11219769	11	124620147	T	G	0.264	-0.235	0.028	3.60E-17	3301	3301	1	0.00140682
ASPH	rs112760834	8	62540134	T	G	0.033	-0.578	0.069	4.10E-17	3301	3301	1	0.00140145
PIANP	rs11064321	12	6809896	C	G	0.397	0.226	0.027	5.00E-17	3301	3301	1	0.0013993
SNCA	rs2245801	4	90757840	C	T	0.788	-0.251	0.03	1.20E-16	3301	3301	1	0.00139806
ADAM12	rs10794057	10	127729734	T	C	0.398	-0.209	0.025	1.20E-16	5457	5457	1	0.00139584
ADH7	rs17529509	4	100351436	C	A	0.927	0.401	0.048	8.00E-17	5457	5457	1	0.0013939
PGLYRP1	rs8102493	19	46530389	C	T	0.333	-0.217	0.026	5.10E-17	3301	3301	1	0.00139123
ALCAM	rs9830049	3	105284045	C	T	0.12	-0.306	0.037	2.80E-16	3301	3301	1	0.00136608
ENTPD1	rs11188501	10	97600919	A	G	0.34	0.215	0.026	2.20E-16	3301	3301	1	0.00136574
RARRES2	rs9640161	7	150045910	A	C	0.371	0.347	0.042	3.05E-16	3788	3788	1	0.00136332
APMAP	rs8125909	20	24975835	C	A	0.132	0.297	0.036	2.80E-16	3301	3301	1	0.0013594
CCL4L1	rs2687507	17	34433964	C	T	0.747	-0.239	0.029	1.50E-16	5457	5457	1	0.00135656
MATN4	rs11697677	20	43925554	G	A	0.254	-0.23	0.028	2.50E-16	3301	3301	1	0.00134767
POGLUT1	rs75203710	3	119121679	C	T	0.07	0.394	0.048	3.80E-16	3301	3301	1	0.00134572
PIGR	rs2007272	1	207113755	C	G	0.426	-0.205	0.025	1.40E-16	3301	3301	1	0.00134299
MTHFS	rs7173566	15	80211691	C	T	0.343	-0.213	0.026	6.00E-16	3301	3301	1	0.00134048
SPON2	rs878323	4	1169813	T	G	0.687	-0.213	0.026	1.80E-16	5457	5457	1	0.00134048
KLRB1	rs3933456	12	9753788	C	A	0.625	0.213	0.026	2.10E-16	5457	5457	1	0.00134048
IGDCC4	rs8034057	15	65789430	G	A	0.905	0.344	0.042	3.50E-16	5457	5457	1	0.00133988
PPP3CA;PP P3R1	rs17266357	4	102721809	C	T	0.31	0.368	0.045	8.67E-16	3788	3788	1	0.00133573
PLXNC1	rs7972001	12	94623502	T	C	0.034	-1.005	0.123	7.77E-16	3788	3544.5	2	0.0102735
ADM	rs2923091	11	10358145	A	G	0.662	-0.204	0.025	2.28E-16	3301	3301	1	0.00132994
GP5	rs1466733	3	194120998	A	G	0.737	0.171	0.021	8.60E-17	3301	3301	1	0.00132437
CPZ	rs2631738	4	8479754	G	A	0.519	0.195	0.024	1.00E-15	3301	3301	1	0.00131857
MGAT2	rs28396798	14	50075319	T	C	0.547	0.195	0.024	1.30E-15	3301	3301	1	0.00131857
FSTL1	rs1147707	3	120169248	T	C	0.389	-0.211	0.026	1.10E-16	3301	3301	1	0.00131546
GZMM	rs16989724	19	531115	T	C	0.935	0.43	0.053	3.90E-16	3301	3301	1	0.00131475
TF	rs4854760	3	133498741	A	G	0.735	-0.227	0.028	6.10E-16	5457	5457	1	0.00131279
IL7	rs72666886	8	79728782	C	T	0.903	0.34	0.042	5.30E-16	5457	5457	1	0.00130894
CKM	rs11559024	19	45821183	C	T	0.022	-0.679	0.084	9.10E-16	3301	3301	1	0.0013051
MAN1A2	rs1289863	1	117854689	C	T	0.692	0.21	0.026	1.50E-15	5457	5457	1	0.00130303
PCDH9	rs1927820	13	67774646	G	C	0.846	-0.266	0.033	2.20E-15	5457	5457	1	0.00129778
IFNAR1	rs2257167	21	34715699	C	G	0.134	-0.29	0.036	1.40E-15	3301	3301	1	0.00129616
RGMA	rs3752102	15	93616014	A	C	0.473	-0.201	0.025	2.50E-16	3301	3301	1	0.00129116
CXCL16	rs144830084	17	4618101	T	A	0.256	-0.225	0.028	1.40E-15	3301	3301	1	0.00128979
APOF	rs808919	12	56647911	C	G	0.903	0.321	0.04	6.90E-16	5457	5457	1	0.00128636
CHL1	rs1015456	3	107776	C	T	0.392	-0.208	0.026	3.20E-16	3301	3301	1	0.00127836
SERPINA3	rs6575449	14	95097303	T	C	0.186	-0.432	0.054	1.90E-15	3788	3788	1	0.00127836
AZU1	rs351976	19	806673	T	C	0.709	0.216	0.027	1.50E-15	5457	5457	1	0.00127836
CNDP1	rs17817077	18	72209543	A	G	0.406	0.35	0.044	4.72E-15	3788	3788	1	0.0012639
REG4	rs79795228	1	120359286	A	C	0.015	0.794	0.1	1.40E-15	3301	3301	1	0.00125928
SEMA4C	rs112826173	2	97489654	A	G	0.981	0.713	0.09	4.00E-15	5457	5457	1	0.00125366
PTGDS	rs7019538	9	139861470	C	T	0.524	0.198	0.025	7.80E-16	3301	3301	1	0.00125296
SERPINA1	rs2749534	14	94809760	G	A	0.201	0.427	0.054	5.55E-15	3788	3788	1	0.00124898
CST6	rs3825068	11	65768093	G	A	0.028	0.597	0.076	3.20E-15	3301	3301	1	0.00123258
PLG	rs783150	6	161226939	T	C	0.114	-0.517	0.066	8.70E-15	3788	3788	1	0.00122572
CCL8	rs3138036	17	32647544	G	A	0.145	-0.47	0.06	1.33E-14	3788	3788	1	0.00122572
CCL27	rs2070074	9	34649442	A	G	0.907	0.321	0.041	1.00E-14	5457	5457	1	0.00122445
AKR1B1	rs2229542	7	134135621	C	T	0.014	-0.819	0.105	4.70E-15	3301	3301	1	0.00121532
GSTM3	rs115929572	1	110246053	G	A	0.935	-0.249	0.032	3.40E-15	5457	5457	1	0.00120949
GALNT16	rs12100668	14	69793475	G	A	0.408	-0.194	0.025	4.40E-15	5457	5457	1	0.0012029
VSIR	rs10762477	10	73531069	G	A	0.148	0.271	0.035	1.70E-14	3301	3301	1	0.0011976
NRP2	rs16837641	2	206634869	A	G	0.322	0.209	0.027	1.10E-14	3301	3301	1	0.00119695
TNFRSF11A	rs884205	18	60054857	C	A	0.756	-0.224	0.029	2.00E-14	3301	3301	1	0.00119182
CCNH	rs2230641	5	86695274	G	A	0.205	-0.239	0.031	1.20E-14	3301	3301	1	0.00118737
JAM3	rs655627	11	134021859	A	G	0.566	0.184	0.024	4.10E-14	5457	5457	1	0.00117417
AP1G2	rs12897422	14	24033027	G	A	0.858	0.268	0.035	1.30E-14	5457	5457	1	0.00117126
RNASE3	rs2771316	14	21430474	C	T	0.723	0.214	0.028	1.20E-14	5457	5457	1	0.0011669
DLL1	rs959025	6	170588654	T	C	0.416	0.191	0.025	1.30E-14	3301	3301	1	0.00116603
IL1RN	rs6761276	2	113832312	C	T	0.578	-0.191	0.025	1.50E-14	3301	3301	1	0.00116603
ISLR2	rs2959011	15	74611781	T	A	0.342	0.198	0.026	3.20E-14	3301	3301	1	0.00115854
MMP7	rs11568819	11	102401633	A	G	0.067	0.668	0.088	5.84E-14	3788	3788	1	0.00115111
TFF1	rs3761376	21	43787038	A	G	0.242	-0.22	0.029	3.90E-14	3301	3301	1	0.00114969
LANCL1	rs187097936	2	211362949	C	G	0.985	0.781	0.103	3.70E-14	5457	5457	1	0.00114857
ORM1	rs116994374	9	117084672	G	A	0.94	-0.409	0.054	2.55E-14	3301	3301	1	0.00114602
LRIG3	rs11172791	12	59272973	C	T	0.045	-0.462	0.061	4.80E-14	3301	3301	1	0.00114592
VAV1	rs56100731	19	6857245	C	T	0.93	0.363	0.048	5.60E-14	5457	5457	1	0.00114252
GDI2	rs2890364	10	5833748	G	A	0.774	0.219	0.029	9.10E-14	5457	5457	1	0.00113927
COL18A1	rs2274809	21	46906711	G	A	0.645	0.166	0.022	1.97E-14	3301	3301	1	0.00113738
LGALS4	rs55945853	19	39230046	G	A	0.51	0.181	0.024	7.70E-14	5457	5457	1	0.00113624
BOC	rs73235147	3	112973955	A	T	0.833	-0.241	0.032	1.10E-13	5457	5457	1	0.00113311
ARHGAP1	rs5899	11	46747662	C	T	0.989	0.835	0.111	8.40E-14	5457	5457	1	0.00113049
FAM213A	rs10887868	10	82194264	A	G	0.412	-0.188	0.025	5.50E-14	3301	3301	1	0.00112973
CA8	rs7009482	8	61195053	G	A	0.589	-0.188	0.025	5.90E-14	5457	5457	1	0.00112973
UROS	rs10794029	10	127561568	G	A	0.794	-0.233	0.031	7.60E-14	3301	3301	1	0.00112857
XXYLT1	rs55947051	3	194783033	T	C	0.841	-0.248	0.033	8.60E-14	5457	5457	1	0.00112828
SCUBE1	rs2744874	22	43715862	T	C	0.866	-0.27	0.036	3.80E-14	5457	5457	1	0.00112374
CA3	rs2072696	8	86351051	C	G	0.238	-0.217	0.029	6.80E-14	3301	3301	1	0.00111858
GNPTG	rs4984820	16	1407809	C	T	0.923	-0.344	0.046	8.00E-14	5457	5457	1	0.00111724
RSPO4	rs6056847	20	1028346	G	A	0.575	-0.172	0.023	9.00E-14	5457	5457	1	0.00111724
MAN1C1	rs3767879	1	26070909	C	T	0.465	0.172	0.023	9.30E-14	5457	5457	1	0.00111724
CRP	rs2211320	1	159693605	G	A	0.677	0.149	0.02	4.77E-14	3301	3301	1	0.00110882
DSC2	rs1789063	18	28673913	A	T	0.769	-0.216	0.029	1.80E-13	3301	3301	1	0.00110831
CNTFR	rs10972159	9	34593086	A	G	0.018	-0.7	0.094	1.00E-13	3301	3301	1	0.00110787
CYB5D2	rs77246175	17	4072761	G	C	0.921	-0.342	0.046	2.00E-13	5457	5457	1	0.0011043
GPC5	rs2147190	13	92058888	T	C	0.336	0.334	0.045	2.27E-13	3788	3544.5	2	0.0213667
TIRAP	rs111577916	11	126071349	T	G	0.025	-0.571	0.077	1.60E-13	3301	3301	1	0.00109861
MAPKAPK2	rs6669284	1	206890435	A	G	0.349	0.326	0.044	3.90E-13	3788	3788	1	0.00109669
CROT	rs77463367	7	87006034	C	G	0.93	0.348	0.047	1.60E-13	5457	5457	1	0.00109526
ALPG	rs10933394	2	233249080	T	C	0.642	-0.192	0.026	1.00E-13	5457	5457	1	0.00108946
APOA5	rs964184	11	116648917	C	G	0.869	0.263	0.036	4.90E-13	3301	3301	1	0.00106628
CACNA2D3	rs34084772	3	54153517	A	G	0.184	-0.233	0.032	5.10E-13	3301	3301	1	0.00105921
C5	rs1035029	9	123742818	A	G	0.611	0.182	0.025	2.10E-13	5457	5457	1	0.00105885
WFIKKN1	rs11248941	16	658271	G	T	0.732	-0.203	0.028	2.30E-13	5457	5457	1	0.00105015
SERPINF2	rs11657394	17	1636950	A	C	0.077	-0.346	0.048	5.40E-13	3301	3301	1	0.00103812
OSMR	rs357253	5	38907422	T	C	0.232	0.209	0.029	8.30E-13	3301	3301	1	0.00103771
LSAMP	rs17646258	3	116038249	C	T	0.829	0.222	0.031	1.50E-12	5457	5457	1	0.00102463
PLAT	rs77346091	8	42020158	T	C	0.973	0.549	0.077	1.20E-12	5457	5457	1	0.00101567
DEFA1	rs4284061	8	6878257	A	T	0.431	0.171	0.024	3.30E-12	5457	5457	1	0.00101428
GSTP1	rs1695	11	67352689	G	A	0.345	-0.178	0.025	2.30E-12	3301	3301	1	0.00101286
KIAA2013	rs11588551	1	11941936	T	C	0.418	0.178	0.025	2.00E-12	5457	5457	1	0.00101286
GALP	rs111265125	19	56688781	C	G	0.022	0.647	0.091	1.00E-12	3301	3301	1	0.00100999
PLAUR	rs2302524	19	44156472	T	C	0.82	0.22	0.031	7.90E-13	5457	5457	1	0.00100627
FABP1	rs2241883	2	88424066	C	T	0.303	-0.191	0.027	2.40E-12	3301	3301	1	0.00099985
AFM	rs41265665	4	74361142	A	G	0.032	-0.862	0.122	3.03E-12	3788	3788	1	0.000997451
GNRH2	rs3787480	20	3016895	A	G	0.149	-0.24	0.034	2.30E-12	3301	3301	1	0.000995548
GFRAL	rs72975088	6	55535375	T	A	0.148	0.247	0.035	1.30E-12	3301	3301	1	0.000995074
CD200R1	rs6791672	3	112591392	A	G	0.591	-0.176	0.025	2.80E-12	3301	3301	1	0.00099025
LRP12	rs72679151	8	105627117	C	T	0.796	-0.211	0.03	2.60E-12	5457	5457	1	0.000988378
CBLN4	rs74447607	20	54447947	T	C	0.192	-0.218	0.031	3.00E-12	3301	3301	1	0.000988076
TNFRSF6B	rs62217798	20	62347189	T	G	0.784	-0.224	0.032	1.40E-12	3301	3301	1	0.000979041
CSGALNAC	rs2435349	10	43643466	G	A	0.273	-0.196	0.028	1.60E-12	3301	3301	1	0.000979041
SEMA3C	rs1019016	7	80570562	T	G	0.581	0.175	0.025	1.60E-12	3301	3301	1	0.000979041
DEFB104A	rs183772362	8	7243016	T	C	0.033	0.504	0.072	2.10E-12	3301	3301	1	0.000979041
DKK 1	rs1194673	10	54141652	A	G	0.632	0.182	0.026	2.80E-12	3301	3301	1	0.000979041
SPARCL1	rs1462372	4	88478750	C	T	0.327	0.321	0.046	6.31E-12	3788	3544.5	2	0.0107046
PDE5A	rs4834770	4	120241849	A	G	0.434	-0.314	0.045	3.63E-12	3788	3788	1	0.00097284
IFNLR1	rs12046369	1	24526135	G	T	0.853	0.244	0.035	3.30E-12	5457	5457	1	0.000971072
NOV	rs58936256	8	120422799	C	T	0.215	0.209	0.03	4.20E-12	3301	3301	1	0.000969748
SELPLG	rs73191242	12	109013956	G	A	0.795	0.209	0.03	2.10E-12	5457	5457	1	0.000969748
PIP	rs4726600	7	142881540	G	A	0.741	-0.188	0.027	7.80E-12	5457	5457	1	0.000968718
WFDC5	rs35017113	20	43692684	C	T	0.843	0.229	0.033	4.70E-12	5457	5457	1	0.000962177
ERLEC1	rs58359565	2	53958919	A	C	0.219	-0.208	0.03	2.10E-12	3301	3301	1	0.000960499
BCAN	rs7541549	1	156588439	T	C	0.767	0.201	0.029	5.60E-12	5457	5457	1	0.000959863
CNP	rs12602950	17	40123829	A	G	0.704	0.187	0.027	3.80E-12	5457	5457	1	0.000958449
UBASH3B	rs10502249	11	122504251	G	T	0.712	0.187	0.027	1.10E-11	5457	5457	1	0.000958449
PLEKHA7	rs382280	11	16857799	T	C	0.121	0.277	0.04	4.80E-12	3301	3301	1	0.000958193
CPM	rs1908671	12	69433404	C	G	0.292	-0.186	0.027	8.10E-12	3301	3301	1	0.000948236
EVA1C	rs6517101	21	33868483	G	T	0.331	0.179	0.026	5.90E-12	3301	3301	1	0.000947061
GHR	rs150036324	5	42738222	C	A	0.594	0.179	0.026	1.00E-11	3301	3301	1	0.000947061
KYAT3	rs9787133	1	89382664	G	C	0.494	-0.172	0.025	2.90E-12	3301	3301	1	0.000945793
MTRF1L	rs503366	6	153333550	C	T	0.497	0.165	0.024	1.10E-11	3301	3301	1	0.00094442
PXDN	rs34008669	2	1709779	G	A	0.502	0.158	0.023	1.80E-11	5457	5457	1	0.000942929
MRC2	rs146385050	17	60637258	A	C	0.195	-0.219	0.032	1.30E-11	3301	3301	1	0.000935862
AGT	rs2493151	1	230878561	A	G	0.235	0.335	0.049	2.22E-11	3788	3788	1	0.000933946
GP1BA	rs72835078	17	4826592	T	G	0.072	0.328	0.048	9.10E-12	3301	3301	1	0.000933018
CASP3	rs870825	4	185588045	G	A	0.157	-0.396	0.058	1.80E-11	3788	3788	1	0.00093145
NEO1	rs12903656	15	73326961	C	G	0.101	0.286	0.042	5.50E-12	3301	3301	1	0.000926533
ADAM22	rs6966166	7	87455155	T	C	0.478	-0.177	0.026	9.80E-12	5457	5457	1	0.000926035
TYMP	rs131798	22	50971509	G	T	0.773	0.204	0.03	1.80E-11	5457	5457	1	0.000923946
DUT	rs117540572	15	48670241	G	A	0.939	-0.339	0.05	2.10E-11	5457	5457	1	0.000918524
THBS4	rs35351529	5	79390222	T	C	0.923	-0.298	0.044	2.30E-11	5457	5457	1	0.000916556
RRM2B	rs74589258	8	103215228	G	A	0.07	0.325	0.048	1.10E-11	3301	3301	1	0.000916044
LGALS9	rs62055780	17	25971795	T	C	0.753	0.203	0.03	7.90E-12	5457	5457	1	0.000914918
DSG2	rs2704050	18	29095888	G	A	0.493	-0.169	0.025	9.30E-12	3301	3301	1	0.000913117
PLXNA1	rs891762	3	126739012	G	T	0.318	-0.182	0.027	9.60E-12	5457	5457	1	0.000907927
COLEC12	rs2846667	18	466810	G	T	0.745	0.202	0.03	9.30E-12	3301	3301	1	0.000905934
LYVE1	rs114527818	11	10619041	T	A	0.951	-0.369	0.055	3.30E-11	5457	5457	1	0.000899428
ST6GALNAC6	rs183995738	9	130542640	C	A	0.987	-0.715	0.107	3.10E-11	5457	5457	1	0.000892251
PTHLH	rs10843115	12	28307717	T	C	0.271	0.186	0.028	1.40E-11	3301	3301	1	0.000881773
B3GALT6	rs3766186	1	1162435	C	A	0.899	0.271	0.041	6.50E-11	5457	5457	1	0.000873015
ADGRE2	rs7260110	19	14501544	G	A	0.36	0.297	0.045	5.17E-11	3788	3788	1	0.000870442
SERPINA4	rs10135681	14	95007744	C	T	0.395	0.277	0.042	8.42E-11	3788	3544.5	2	0.0104872
PCBD1	rs72818110	10	72614896	A	C	0.951	0.374	0.057	7.60E-11	5457	5457	1	0.0008603
NMB	rs12912342	15	85248216	T	C	0.661	0.164	0.025	7.60E-11	5457	5457	1	0.000859932
CCL5	rs4239252	17	34163565	A	G	0.211	-0.346	0.053	7.83E-11	3788	3788	1	0.000851649
CHST12	rs2969076	7	2473747	A	G	0.872	-0.235	0.036	7.30E-11	5457	5457	1	0.000851512
GLO1	rs12209477	6	38669799	C	G	0.66	0.168	0.026	7.10E-11	5457	5457	1	0.000834333
DYNLL2	rs35729384	17	56178900	C	T	0.698	0.161	0.025	2.90E-10	5457	5457	1	0.000828785
EPHA2	rs28629977	1	16497272	C	G	0.564	-0.148	0.023	2.00E-10	5457	5457	1	0.000827443
NPNT	rs78213340	4	106819613	T	C	0.93	0.314	0.049	1.70E-10	5457	5457	1	0.000820617
TNFRSF19	rs3814787	13	24152370	G	C	0.714	-0.166	0.026	2.10E-10	5457	5457	1	0.000814602
CLN5	rs7996555	13	77562492	C	T	0.946	0.35	0.055	1.50E-10	5457	5457	1	0.000809262
TREM2	rs114812713	6	41034000	G	C	0.955	0.36	0.057	3.10E-10	5457	5457	1	0.000797148
NTRK3	rs9944243	15	88514162	T	G	0.879	-0.221	0.035	5.20E-10	5457	5457	1	0.000796769
NLGN2	rs150452493	17	7303808	C	T	0.9	0.252	0.04	4.90E-10	5457	5457	1	0.00079317
ADH4	rs1800759	4	100065509	G	T	0.622	0.157	0.025	4.10E-10	5457	5457	1	0.000788146
IL1R1	rs7588201	2	102746276	A	C	0.722	0.163	0.026	2.60E-10	5457	5457	1	0.000785448
ENDOU	rs2072117	12	48131728	G	A	0.711	-0.163	0.026	3.80E-10	5457	5457	1	0.000785448
CSF1	rs17610659	1	110503296	T	C	0.48	0.15	0.024	6.50E-10	3394	3394	1	0.00078064
C9	rs265721	5	39354069	G	A	0.959	-0.375	0.06	5.90E-10	5457	5457	1	0.00078064
SRL	rs8046884	16	4269558	C	G	0.495	0.15	0.024	6.30E-10	5457	5457	1	0.00078064
IGFBP5	rs139739387	2	217402489	A	G	0.984	0.608	0.098	7.00E-10	5457	5457	1	0.00076922
METTL24	rs12189608	6	110573292	A	T	0.956	0.378	0.061	7.40E-10	5457	5457	1	0.000767398
NEGR1	rs2220253	1	72565460	T	C	0.545	0.148	0.024	1.20E-09	5457	5457	1	0.000759978
LAG3	rs3782735	12	6885076	A	G	0.607	0.154	0.025	4.30E-10	5457	5457	1	0.000758336
LRP8	rs10218811	1	53805882	A	G	0.725	0.166	0.027	9.80E-10	5457	5457	1	0.000755423
ULBP3	rs17054300	6	150370552	G	A	0.762	0.171	0.028	1.70E-09	5457	5457	1	0.000745388
FGFR3	rs2403274	4	1754515	C	G	0.752	0.177	0.029	6.70E-10	5457	5457	1	0.000744487
UXS1	rs12617748	2	106836042	G	A	0.87	-0.219	0.036	1.70E-09	5457	5457	1	0.000739591
PDIA3	rs3110081	15	43995786	C	T	0.821	0.194	0.032	1.50E-09	5457	5457	1	0.000734538
FETUB	rs3733159	3	186360409	G	T	0.312	0.266	0.044	1.43E-09	3788	3788	1	0.000730417
AFP	rs6829551	4	74173715	T	C	0.812	0.187	0.031	2.40E-09	5457	5457	1	0.000727233
OLFM1	rs11103667	9	137978360	C	T	0.815	-0.193	0.032	2.60E-09	5457	5457	1	0.000726991
TYRO3	rs2289743	15	41860698	C	G	0.691	-0.161	0.027	2.10E-09	5457	5457	1	0.000710633
LGMN	rs7140705	14	93224207	T	G	0.913	-0.268	0.045	3.60E-09	5457	5457	1	0.00070887
LGALS3BP	rs4789847	17	77004644	A	G	0.829	-0.196	0.033	3.90E-09	5457	5457	1	0.000705031
CLEC11A	rs13866	19	51228746	C	T	0.691	0.154	0.026	4.00E-09	5457	5457	1	0.000701165
ADIPOQ	rs143257534	3	186551888	C	T	0.974	0.425	0.072	3.30E-09	5457	5457	1	0.00069637
CA1	rs2453868	8	86302696	T	C	0.582	-0.147	0.025	2.20E-09	5457	5457	1	0.00069101
RBP4	rs36014035	10	95360027	A	C	0.643	0.147	0.025	7.20E-09	5457	5457	1	0.00069101
UNC5D	rs6468316	8	35237788	T	C	0.417	0.141	0.024	9.50E-09	5457	5457	1	0.000689836
GSN	rs76331566	9	124009014	C	T	0.969	0.398	0.068	5.00E-09	5457	5457	1	0.000684669
SPINK5	rs2052536	5	147504557	T	G	0.349	-0.152	0.026	3.30E-09	5457	5457	1	0.000683083
APOBEC3G	rs738469	22	39510995	A	G	0.903	0.245	0.042	4.50E-09	5457	5457	1	0.000680093
CDCP1	rs7621542	3	45206484	C	T	0.8	0.18	0.031	5.90E-09	5457	5457	1	0.000673843
ZG16B	rs2190809	16	2880614	C	T	0.725	0.156	0.027	1.50E-08	5457	5457	1	0.000667209
MENT	rs12759273	1	151045024	C	A	0.988	0.669	0.116	8.60E-09	5457	5457	1	0.000664779
CALCOCO2	rs550510	17	46926615	G	A	0.843	0.19	0.033	1.00E-08	5457	5457	1	0.000662554
OSCAR	rs4442925	19	54554950	T	C	0.455	0.138	0.024	1.30E-08	5457	5457	1	0.000660813
IL10RB	rs2834167	21	34640788	A	G	0.732	0.16	0.028	1.10E-08	5457	5457	1	0.000652635
LRRC4C	rs998447	11	40310789	A	C	0.538	-0.137	0.024	2.20E-08	5457	5457	1	0.000651277
BPIFA2	rs141715080	20	31742114	C	T	0.973	0.429	0.076	2.00E-08	5457	5457	1	0.000636855
DNER	rs35032874	2	230309360	T	G	0.741	0.162	0.029	1.70E-08	5457	5457	1	0.000623725
HSD17B14	rs473464	19	49334248	T	C	0.498	0.145	0.026	2.70E-08	5457	5457	1	0.000621655
FMOD	rs4971253	1	203321414	G	A	0.921	0.25	0.045	2.70E-08	5457	5457	1	0.000616903
TREML1	rs62396317	6	41095817	A	G	0.878	0.211	0.038	2.90E-08	5457	5457	1	0.000616254
CXCL10	rs4859589	4	76948299	G	A	0.505	0.133	0.024	5.00E-08	5457	5457	1	0.000613824
MCAM	rs11217234	11	119177938	A	G	0.718	-0.144	0.026	4.32E-08	3301	3301	1	0.000613115
PTPRU	rs2179795	1	29642318	G	T	0.725	0.154	0.028	3.80E-08	5457	5457	1	0.000604634
TNFRSF10B	rs4871844	8	22879734	T	C	0.658	-0.143	0.026	4.30E-08	5457	5457	1	0.000604634
FBLN1	rs67136035	22	45813433	T	D	0.541	0.132	0.024	5.00E-08	5457	5457	1	0.000604634
C1QTNF3	rs840390	5	34018623	G	A	0.868	0.203	0.037	2.80E-08	5457	5457	1	0.000601668

## Sheet: Table S2
Supplementary Table 2. Genetic instruments of prostate cancer for bidirectional MR analysis
chr	pos	beta	se	pval	samplesize	id	SNP	effect_allele	other_allele	eaf
10	114712154	0.0435	0.008	4.84e-08	140254	ieu-b-85	rs7094871	G	C	0.5403
11	134266372	0.0639	0.0117	4.77e-08	140254	ieu-b-85	rs878987	G	A	0.1459
6	76495882	-0.0635	0.0116	4.68e-08	140254	ieu-b-85	rs9443189	G	A	0.1429
2	202124997	0.05	0.0091	3.53e-08	140254	ieu-b-85	rs6754084	C	T	0.7324
18	73036165	-0.0441	0.008	3.48e-08	140254	ieu-b-85	rs10460109	C	T	0.5857
6	43694598	-0.0521	0.0094	3.36e-08	140254	ieu-b-85	rs4711748	C	T	0.7746
17	56474906	-0.0447	0.0081	3.34e-08	140254	ieu-b-85	rs2189681	C	G	0.4076
7	27204732	-0.0854	0.0155	3.33e-08	140254	ieu-b-85	rs35355140	A	C	0.0781
2	174234547	0.0466	0.0084	2.82e-08	140254	ieu-b-85	rs34925593	C	T	0.4817
1	88213014	-0.0458	0.0082	2.58e-08	140254	ieu-b-85	rs12139208	C	T	0.6286
22	28888939	0.1338	0.024	2.43e-08	140254	ieu-b-85	rs9625483	A	G	0.0288
9	18564470	-0.0481	0.0086	2.36e-08	140254	ieu-b-85	rs12004058	G	C	0.312
18	51772473	0.0451	0.0081	2.31e-08	140254	ieu-b-85	rs8093601	C	G	0.4421
9	110152977	-0.0733	0.0131	2.14e-08	140254	ieu-b-85	rs817833	T	G	0.8914
16	82169385	-0.0463	0.0082	1.91e-08	140254	ieu-b-85	rs4889467	T	C	0.6506
11	68886460	0.0608	0.0108	1.86e-08	140254	ieu-b-85	rs12419854	T	A	0.1622
8	128331150	0.1055	0.0187	1.8e-08	140254	ieu-b-85	rs200857541	A	C	0.0465
14	23305649	-0.0462	0.0082	1.55e-08	140254	ieu-b-85	rs1004030	C	T	0.4156
9	34049779	-0.0501	0.0088	1.34e-08	140254	ieu-b-85	rs10122495	A	T	0.704
15	40922915	0.0622	0.0109	1.32e-08	140254	ieu-b-85	rs4924487	C	G	0.8359
16	57693055	-0.0533	0.0094	1.27e-08	140254	ieu-b-85	rs16958674	T	C	0.2385
1	204029890	-0.0457	0.008	1.21e-08	140254	ieu-b-85	rs7522437	A	G	0.4609
16	89940386	0.2246	0.0394	1.18e-08	140254	ieu-b-85	rs13332673	T	G	0.0129
15	56385868	-0.1761	0.0308	1.1e-08	140254	ieu-b-85	rs33984059	G	A	0.0225
3	106962521	0.047	0.0082	8.81e-09	140254	ieu-b-85	rs1283104	G	C	0.3788
3	141140366	0.0459	0.008	8.47e-09	140254	ieu-b-85	rs6763927	T	A	0.4406
19	17214073	-0.0516	0.009	8.17e-09	140254	ieu-b-85	rs11666569	T	C	0.2867
11	108143456	0.15	0.026	8.15e-09	140254	ieu-b-85	rs1800057	G	C	0.0234
18	56746315	0.0498	0.0086	7.68e-09	140254	ieu-b-85	rs12956892	T	G	0.3021
11	1507512	-0.0581	0.0101	7.42e-09	140254	ieu-b-85	rs1881502	C	T	0.8097
5	177968915	0.0737	0.0127	6.73e-09	140254	ieu-b-85	rs4976790	T	G	0.1131
10	90195149	-0.0477	0.0082	6.55e-09	140254	ieu-b-85	rs1935581	T	C	0.3728
6	30601232	0.0615	0.0106	5.56e-09	140254	ieu-b-85	rs12665339	G	A	0.1674
5	44392142	-0.0501	0.0085	3.58e-09	140254	ieu-b-85	rs1482680	A	G	0.6667
1	205724302	-0.0472	0.008	3.38e-09	140254	ieu-b-85	rs823121	A	G	0.4322
3	128263668	-0.0524	0.0088	2.99e-09	140254	ieu-b-85	rs9812088	A	G	0.3
12	133054609	-0.0531	0.0089	2.87e-09	140254	ieu-b-85	rs10870546	G	A	0.7122
2	10135681	0.0784	0.0131	2.09e-09	140254	ieu-b-85	rs113577745	G	C	0.098
5	172959030	0.0482	0.008	1.94e-09	140254	ieu-b-85	rs9686557	C	A	0.444
17	30092614	-0.0618	0.0103	1.64e-09	140254	ieu-b-85	rs4795643	A	C	0.2287
9	132576060	0.0581	0.0095	1.1e-09	140254	ieu-b-85	rs1182	A	C	0.2198
6	160711566	-0.0559	0.0091	6.5e-10	140254	ieu-b-85	rs12179053	T	C	0.2603
15	66705043	0.0567	0.0091	4.64e-10	140254	ieu-b-85	rs80326387	A	G	0.2583
6	160147630	-0.0569	0.0091	3.22e-10	140254	ieu-b-85	rs1048019	G	A	0.2849
6	109287209	0.0704	0.0111	1.99e-10	140254	ieu-b-85	rs6941125	A	T	0.1457
14	69134264	0.0512	0.0079	1e-10	140254	ieu-b-85	rs767127	G	A	0.4989
3	152064639	-0.0873	0.0134	6.51e-11	140254	ieu-b-85	rs17369534	C	G	0.1047
12	49693337	0.0695	0.0106	6.42e-11	140254	ieu-b-85	rs58053634	T	G	0.1792
5	133836209	0.0527	0.008	5.43e-11	140254	ieu-b-85	rs10793821	T	C	0.5795
12	48419618	-0.0957	0.0142	1.89e-11	140254	ieu-b-85	rs80130819	C	A	0.0916
16	57654576	-0.1481	0.022	1.78e-11	140254	ieu-b-85	rs11863709	T	C	0.0403
3	87398945	-0.1452	0.0216	1.71e-11	140254	ieu-b-85	rs75358080	G	A	0.0373
10	126697114	0.0598	0.0089	1.62e-11	140254	ieu-b-85	rs4962419	A	G	0.2664
2	62781499	0.0551	0.0081	1.17e-11	140254	ieu-b-85	rs7580494	T	C	0.3878
1	150658287	0.0654	0.0096	9.87e-12	140254	ieu-b-85	rs17599629	G	A	0.2181
5	1543918	0.1432	0.021	8.74e-12	140254	ieu-b-85	rs13174377	G	A	0.04
22	19749525	0.0568	0.0083	8.54e-12	140254	ieu-b-85	rs1978060	G	A	0.6127
12	90227779	-0.0604	0.0088	8.14e-12	140254	ieu-b-85	rs35644221	A	G	0.3192
12	65011980	-0.0563	0.0082	5.72e-12	140254	ieu-b-85	rs7313765	A	G	0.4218
8	23437981	-0.0553	0.008	5.38e-12	140254	ieu-b-85	rs2928681	A	C	0.5887
21	42866332	0.23	0.0332	4.5e-12	140254	ieu-b-85	rs61735792	A	G	0.0158
13	73714290	-0.0685	0.0099	4.37e-12	140254	ieu-b-85	rs7996468	T	C	0.7756
6	30901895	-0.0552	0.008	4.27e-12	140254	ieu-b-85	rs3131785	G	C	0.5194
2	111893096	-0.0635	0.0091	3.51e-12	140254	ieu-b-85	rs11691517	G	T	0.2589
14	37138294	0.0573	0.0082	2.34e-12	140254	ieu-b-85	rs11629412	C	G	0.5821
21	42882462	-0.1009	0.0143	2.02e-12	140254	ieu-b-85	rs9978557	T	C	0.098
6	11217897	-0.0679	0.0096	1.91e-12	140254	ieu-b-85	rs2018336	C	T	0.2206
22	40500261	-0.0721	0.0102	1.55e-12	140254	ieu-b-85	rs145571764	G	GA	0.8173
10	122796182	0.0572	0.0081	1.39e-12	140254	ieu-b-85	rs1004934	C	G	0.3874
12	14416918	0.0572	0.008	9.8e-13	140254	ieu-b-85	rs10845938	G	A	0.5541
10	897201	0.0775	0.0109	9.34e-13	140254	ieu-b-85	rs34487581	A	G	0.1585
8	25892142	0.0782	0.011	9.19e-13	140254	ieu-b-85	rs11135910	T	C	0.1529
11	76251818	-0.0609	0.0085	7.48e-13	140254	ieu-b-85	rs17749618	G	A	0.324
7	47486259	-0.0603	0.0084	5.9e-13	140254	ieu-b-85	rs201927921	T	TGCAAA	0.6541
22	43502152	-0.0979	0.0135	4.58e-13	140254	ieu-b-85	rs2007886	C	T	0.1065
17	47395729	0.1064	0.0147	4.52e-13	140254	ieu-b-85	rs9907478	T	C	0.0757
1	153923276	0.0631	0.0085	1.02e-13	140254	ieu-b-85	rs10127983	T	C	0.3117
7	40875192	-0.0715	0.0095	6.72e-14	140254	ieu-b-85	rs17621345	C	A	0.2587
9	19055965	0.0609	0.0081	6.53e-14	140254	ieu-b-85	rs1048169	C	T	0.379
6	31283886	-0.0718	0.0092	7.42e-15	140254	ieu-b-85	rs1634741	C	T	0.288
8	128091418	-0.1175	0.015	5.46e-15	140254	ieu-b-85	rs72725868	G	A	0.0881
8	127872105	0.0714	0.0091	5.21e-15	140254	ieu-b-85	rs71564600	CAAAAAAAAA	C	0.7376
9	110256979	-0.2803	0.0358	5.17e-15	140254	ieu-b-85	rs77334358	T	C	0.0173
11	113807181	-0.071	0.009	3.93e-15	140254	ieu-b-85	rs11214775	A	G	0.2915
2	242257835	0.0863	0.011	3.21e-15	140254	ieu-b-85	rs62186433	G	A	0.1486
1	154980351	0.0652	0.0082	1.81e-15	140254	ieu-b-85	rs56103503	T	C	0.3876
4	74442349	-0.1542	0.0192	9.15e-16	140254	ieu-b-85	rs17804499	C	G	0.0534
7	21059022	-0.0686	0.0085	5.51e-16	140254	ieu-b-85	rs917811	T	C	0.6856
20	52456926	-0.0672	0.0083	4.36e-16	140254	ieu-b-85	rs6068688	A	T	0.5262
10	104421679	-0.0699	0.0085	2.54e-16	140254	ieu-b-85	rs12570611	C	G	0.3242
17	7803118	0.1507	0.0182	1.02e-16	140254	ieu-b-85	rs28441558	C	T	0.0548
14	53424320	-0.1005	0.0117	8.46e-18	140254	ieu-b-85	rs62003551	G	A	0.1425
2	10756343	-0.0693	0.008	4.84e-18	140254	ieu-b-85	rs151023712	A	ATTTTTTTTTTTTTT	0.5271
12	114666202	-0.0741	0.0082	1.63e-19	140254	ieu-b-85	rs10774740	T	G	0.3844
20	62373983	-0.0958	0.0106	1.4e-19	140254	ieu-b-85	rs2256814	A	G	0.1904
11	102396607	-0.0745	0.0082	1.17e-19	140254	ieu-b-85	rs12285347	C	T	0.4507
2	242135265	0.2492	0.0267	9.93e-21	140254	ieu-b-85	rs77559646	A	G	0.0237
6	41525739	0.0834	0.0089	8.78e-21	140254	ieu-b-85	rs10947980	G	A	0.2634
19	42001210	0.0875	0.0093	3.25e-21	140254	ieu-b-85	rs2191139	C	T	0.7474
2	20878105	0.0777	0.0082	1.92e-21	140254	ieu-b-85	rs9306894	G	A	0.3633
2	43738173	-0.0809	0.0085	1.48e-21	140254	ieu-b-85	rs1038822	C	T	0.6877
6	153433402	-0.077	0.008	1.04e-21	140254	ieu-b-85	rs6557265	C	T	0.4226
18	76770820	-0.0872	0.009	5.34e-22	140254	ieu-b-85	rs9959454	G	A	0.2672
6	117200434	-0.0843	0.0087	2.9e-22	140254	ieu-b-85	rs339351	A	C	0.3052
2	242139600	-0.3939	0.0403	1.51e-22	140254	ieu-b-85	rs77482050	A	G	0.0145
17	618965	0.0832	0.0082	4.34e-24	140254	ieu-b-85	rs684232	C	T	0.3534
1	204556990	0.0912	0.0089	8.57e-25	140254	ieu-b-85	rs10660539	CCTT	C	0.7157
2	85767735	-0.082	0.008	6.67e-25	140254	ieu-b-85	rs2028900	T	C	0.4418
4	95521863	-0.0888	0.0086	4.34e-25	140254	ieu-b-85	rs12510147	A	G	0.3115
3	113284149	-0.0851	0.008	1.98e-26	140254	ieu-b-85	rs12629813	T	C	0.4371
6	160710851	0.1214	0.0111	6.6e-28	140254	ieu-b-85	rs3127580	T	C	0.1402
3	127889268	0.1032	0.0089	2.36e-31	140254	ieu-b-85	rs6148064	GGTGGTGAGCACC	G	0.2671
19	38744733	-0.0966	0.0079	4.87e-34	140254	ieu-b-85	rs12610267	G	A	0.5103
7	97816327	-0.1005	0.0079	6.96e-37	140254	ieu-b-85	rs6465657	T	C	0.5365
2	173363917	-0.235	0.0183	1.29e-37	140254	ieu-b-85	rs7596665	G	A	0.0546
12	53312612	0.1583	0.0116	1.11e-42	140254	ieu-b-85	rs73110464	T	C	0.1277
2	173303031	-0.2441	0.0176	1.11e-43	140254	ieu-b-85	rs28485589	G	A	0.0608
7	27976563	-0.1335	0.0094	2.04e-45	140254	ieu-b-85	rs10486567	A	G	0.2373
3	87185759	-0.1131	0.0079	3.08e-46	140254	ieu-b-85	rs17023964	C	G	0.4913
2	63277843	0.1175	0.0079	1.11e-49	140254	ieu-b-85	rs58235267	G	C	0.4701
4	106065308	-0.1202	0.0081	8.27e-50	140254	ieu-b-85	rs10007915	G	C	0.4093
17	46550273	0.9553	0.0631	7.5e-52	140254	ieu-b-85	rs146615339	C	G	0.0035
5	1280028	-0.1598	0.0105	3.46e-52	140254	ieu-b-85	rs2242652	A	G	0.2054
8	128018466	-0.1375	0.0085	5.15e-59	140254	ieu-b-85	rs73351629	G	C	0.3334
8	23533623	-0.1291	0.008	5.09e-59	140254	ieu-b-85	rs11135766	T	C	0.5736
3	170074517	-0.1763	0.0102	5.6e-67	140254	ieu-b-85	rs78416326	C	G	0.2062
11	2233574	-0.1704	0.0098	4.94e-68	140254	ieu-b-85	rs7127900	G	A	0.8015
22	43500212	-0.1423	0.008	5.55e-71	140254	ieu-b-85	rs201619718	T	G	0.4979
19	51360840	-0.3028	0.0159	4.26e-81	140254	ieu-b-85	rs62113212	T	C	0.0775
17	69115358	-0.1618	0.0079	6.47e-93	140254	ieu-b-85	rs9911515	G	A	0.5197
11	68992285	0.2201	0.0105	3.07e-98	140254	ieu-b-85	rs12795301	A	C	0.1586
6	160581543	-0.196	0.0087	2.92e-112	140254	ieu-b-85	rs4646284	T	TG	0.7075
17	36103565	0.2033	0.008	3.06e-141	140254	ieu-b-85	rs11263763	A	G	0.5292
8	128413305	-0.2004	0.0079	2.81e-141	140254	ieu-b-85	rs6983267	T	G	0.4892
10	51549496	-0.2075	0.008	2.29e-147	140254	ieu-b-85	rs10993994	C	T	0.617
8	128077146	0.5907	0.0227	1.03e-149	140254	ieu-b-85	rs77541621	A	G	0.0243
8	128531689	-0.355	0.0122	1.1e-187	140254	ieu-b-85	rs11986220	T	A	0.8953

## Sheet: Table S3
Supplementary Table 3. Heterogeneity analysis on proteins with two or more instruments
Protein	outcome	exposure	method	Snps	Q	Q_pval
GPC5	Prostate cancer || id:ieu-b-85	Suhre	Inverse variance weighted	2	1.47159	0.225096
PLXNC1	Prostate cancer || id:ieu-b-85	Sun	Inverse variance weighted	2	0.269472	0.603686
SERPINA4	Prostate cancer || id:ieu-b-85	Suhre	Inverse variance weighted	2	0.138527	0.70975
SPARCL1	Prostate cancer || id:ieu-b-85	Suhre	Inverse variance weighted	2	0.258516	0.611142

## Sheet: Table S4
Supplementary Table 4. Investigating the Previous Genome-Wide significant Associations of SNPs as Genetic Instruments for initial screening proteins
Protein	rsid	hg38_coordinates	Effect Allele	trait	pmid	ancestry	beta	se	p	direction	n_studies	dataset
KDELC2	rs74911261	chr11:108486410	A	Lymphocyte count	27863252	European	0.0619	0.01131	4.485e-08	+	2	Astle-W_Blood-Cell-Traits_EUR_2016
	rs74911261	chr11:108486410	A	Mean corpuscular hemoglobin	27863252	European	-0.06262	0.01114	1.869e-08	-	2	Astle-W_Blood-Cell-Traits_EUR_2016
	rs74911261	chr11:108486410	A	Plateletcrit	27863252	European	0.075	0.01152	7.498e-11	+	2	Astle-W_Blood-Cell-Traits_EUR_2016
	rs74911261	chr11:108486410	A	Breast cancer	29058716	European	-0.1989	0.03026	5e-11	-	-	NHGRI-EBI_GWAS_Catalog
	rs74911261	chr11:108486410	A	Renal cell carcinoma	28598434	European	0.3436	0.05401	2e-10	+	-	NHGRI-EBI_GWAS_Catalog
	rs74911261	chr11:108486410	A	Impedance of arm left	UKBB	European	-0.02964	0.00532	2.522e-08	-	1	Neale-B_UKBB_EUR_2017
	rs74911261	chr11:108486410	A	Impedance of arm right	UKBB	European	-0.03211	0.005297	1.349e-09	-	1	Neale-B_UKBB_EUR_2017
	rs74911261	chr11:108486410	A	Impedance of whole body	UKBB	European	-0.03151	0.005744	4.112e-08	-	1	Neale-B_UKBB_EUR_2017
	rs74911261	chr11:108486410	A	Leiomyoma of uterus	UKBB	European	0.005247	0.0008486	6.308e-10	+	1	Neale-B_UKBB_EUR_2017
	rs74911261	chr11:108486410	A	Self-reported uterine fibroids	UKBB	European	0.006605	0.0009227	8.177e-13	+	1	Neale-B_UKBB_EUR_2017
MSMB	rs10993994	chr10:46046326	C	PCA3 score in patients with a negative prostate biopsy	23555189	European	NA	NA	1.22e-09	NA	-	GRASP
	rs10993994	chr10:46046326	C	Prostate cancer	18264097	European	NA	NA	2e-29	NA	-	GRASP
	rs10993994	chr10:46046326	C	Prostate cancer	19767753	Mixed	NA	NA	2e-28	NA	-	GRASP
	rs10993994	chr10:46046326	C	Prostate cancer	20676098	East Asian	NA	NA	3.4e-08	NA	-	GRASP
	rs10993994	chr10:46046326	C	Prostate cancer	21160077	European	NA	NA	7.7e-15	NA	-	GRASP
	rs10993994	chr10:46046326	C	Prostate cancer aggressiveness	18264096	European	NA	NA	2.96e-14	NA	-	GRASP
	rs10993994	chr10:46046326	C	Prostate specific antigen PSA	23269536	East Asian	NA	NA	4.62e-17	NA	-	GRASP
	rs10993994	chr10:46046326	C	Prostate specific antigen PSA 50 years old	23269536	East Asian	NA	NA	2.8e-17	NA	-	GRASP
	rs10993994	chr10:46046326	C	Serum prostate specific antigen PSA	21160077	European	NA	NA	9.25e-14	NA	-	GRASP
	rs10993994	chr10:46046326	C	PCA3 expression level	23555189	European	-1.25	0.2046	1e-09	-	-	NHGRI-EBI_GWAS_Catalog
	rs10993994	chr10:46046326	C	Prostate cancer	18264096	European	NA	NA	7e-13	NA	-	NHGRI-EBI_GWAS_Catalog
	rs10993994	chr10:46046326	C	Prostate cancer	18264097	European	-0.2231	0.02005	9e-29	-	-	NHGRI-EBI_GWAS_Catalog
	rs10993994	chr10:46046326	C	Prostate cancer	20676098	East Asian	NA	NA	3e-08	NA	-	NHGRI-EBI_GWAS_Catalog
	rs10993994	chr10:46046326	C	Prostate cancer	24753544	European	-0.4	0.03774	3e-26	-	-	NHGRI-EBI_GWAS_Catalog
	rs10993994	chr10:46046326	C	Prostate cancer	25939597	European	NA	NA	1e-15	NA	-	NHGRI-EBI_GWAS_Catalog
	rs10993994	chr10:46046326	C	Prostate cancer	26034056	Mixed	-0.1906	0.02034	7e-21	-	-	NHGRI-EBI_GWAS_Catalog
	rs10993994	chr10:46046326	C	Prostate cancer	26034056	Mixed	-0.1906	0.02188	3e-18	-	-	NHGRI-EBI_GWAS_Catalog
	rs10993994	chr10:46046326	C	Prostate cancer	26443449	East Asian	-0.1863	0.03393	4e-08	-	-	NHGRI-EBI_GWAS_Catalog
	rs10993994	chr10:46046326	C	Prostate specific antigen levels	23269536	East Asian	-0.12	0.01431	5e-17	-	-	NHGRI-EBI_GWAS_Catalog
	rs10993994	chr10:46046326	C	Prostate specific antigen levels	28139693	Mixed	-0.08434	0.00563	1e-50	-	-	NHGRI-EBI_GWAS_Catalog
	rs10993994	chr10:46046326	C	Serum prostate specific antigen levels	21160077	European	-9.2	1.281	7e-13	-	-	NHGRI-EBI_GWAS_Catalog
	rs10993994	chr10:46046326	C	Illnesses of father: prostate cancer	UKBB	European	-0.00429	0.0007053	1.181e-09	-	1	Neale-B_UKBB_EUR_2017
	rs10993994	chr10:46046326	C	Malignant neoplasm of prostate	UKBB	European	-0.001626	0.0002032	1.228e-15	-	1	Neale-B_UKBB_EUR_2017
	rs10993994	chr10:46046326	C	Self-reported prostate cancer	UKBB	European	-0.00176	0.0002127	1.325e-16	-	1	Neale-B_UKBB_EUR_2017
	rs10993994	chr10:46046326	C	Prostate specific antigen	21160077	European	NA	NA	7e-13	NA	-	dbGaP
	rs10993994	chr10:46046326	C	Prostatic neoplasms	18264096	European	NA	NA	7e-13	NA	-	dbGaP
	rs10993994	chr10:46046326	C	Prostatic neoplasms	18264097	European	NA	NA	9e-29	NA	-	dbGaP
	rs10993994	chr10:46046326	C	Prostatic neoplasms	20676098	East Asian	NA	NA	3e-08	NA	-	dbGaP
SPINT2	rs71354995	chr19:38301201	A	Mean platelet volume	27863252	European	0.0268	0.004166	1.252e-10	+	2	Astle-W_Blood-Cell-Traits_EUR_2016
	rs71354995	chr19:38301201	A	Platelet count	27863252	European	-0.02915	0.004199	3.849e-12	-	2	Astle-W_Blood-Cell-Traits_EUR_2016
GSTP1	rs1695	chr11:67585218	A	Mean corpuscular hemoglobin	27863252	European	0.02124	0.003695	9.057e-09	+	2	Astle-W_Blood-Cell-Traits_EUR_2016
	rs1695	chr11:67585218	A	Mean corpuscular volume	27863252	European	0.02167	0.003684	4.077e-09	+	2	Astle-W_Blood-Cell-Traits_EUR_2016
	rs1695	chr11:67585218	A	Height	UKBB	European	0.01047	0.001806	6.747e-09	+	1	Neale-B_UKBB_EUR_2017

## Sheet: Table S5
Supplementary Table 5. Detail information about current drug targets of PCa
Medication	Target	Gene Name	Uniprot ID	Pharmacological Action	Action
Goserelin	Lutropin-choriogonadotropic hormone receptor	LHCGR	P22888	Yes	Agonist
	Gonadotropin-releasing hormone receptor	GNRHR	P30968	Yes	Agonist
Leuprolide	Gonadotropin-releasing hormone receptor	GNRHR	P30968	Yes	Agonist
Triptorelin	Gonadotropin-releasing hormone receptor	GNRHR	P30969	Yes	Agonist
Nilutamide	Androgen receptor	AR	P10275	Yes	Antagonist
Flutamide	Retinoic acid receptor alpha	RARA	P10276	Yes	Antagonist
	Aryl hydrocarbon receptor	AHR	P35869	Unknown	Agonist
	Nuclear receptor subfamily 1 group I member 2	NR1I2	O75469	Unknown	Unknown
Bicalutamide	Androgen receptor	AR	P10275	Yes	Antagonist
Degarelix	Gonadotropin-releasing hormone receptor	GNRHR	P30968	Yes	Antagonist
Relugolix	Gonadotropin-releasing hormone receptor	GNRHR	P30968	Yes	Antagonist
Apalutamide	Androgen receptor	AR	P10275	Yes	Antagonist
	GABA(A) Receptor: Gamma-aminobutyric acid receptor subunit alpha-1	GABRA1	P14867	Yes	Antagonist
	GABA(A) Receptor: Gamma-aminobutyric acid receptor subunit beta-1	GABRB1	P18505	Yes	Antagonist
	GABA(A) Receptor: Gamma-aminobutyric acid receptor subunit delta	GABRB1	O14764	Yes	Antagonist
	GABA(A) Receptor: Gamma-aminobutyric acid receptor subunit epsilon	GABRE	P78334	Yes	Antagonist
	GABA(A) Receptor: Gamma-aminobutyric acid receptor subunit gamma-1	GABRG1	Q8N1C3	Yes	Antagonist
	GABA(A) Receptor: Gamma-aminobutyric acid receptor subunit pi	GABRP	O00591	Yes	Antagonist
	GABA(A) Receptor: Gamma-aminobutyric acid receptor subunit theta	GABRQ	Q9UN88	Yes	Antagonist
Etoposide	DNA topoisomerase 2-alpha	TOP2A	P11388	Yes	Inhibitor
	DNA topoisomerase 2-beta	TOP2B	Q02880	No	Inhibitor
Darolutamide	Androgen receptor	AR	P10275	Yes	Antagonist
	Progesterone receptor	PGR	P06401	Unknown	Antagonist
Docetaxel	Tubulin beta-1 chain	TUBB1	Q9H4B7	Yes	Unknown
	Microtubule-associated protein 2	MAP2	P11137	Yes	Unknown
	Microtubule-associated protein 4	MAP4	P27816	Yes	Unknown
	Microtubule-associated protein tau	MAPT	P10636	Yes	Unknown
		BCL2	P10415	Unknown	Unknown
	Nuclear receptor subfamily 1 group I member 2	NR1I2	O75469	Unknown	Binder
Abiraterone	Steroid 17-alpha-hydroxylase/17,20 lyase	CYP17A1	P05093	Yes	Inhibitor
Enzalutamide	Androgen receptor	AR	P10275	Yes	Inhibitor
Cabazitaxel	Tubulin beta-1 chain	TUBB1	Q9H4B7	Yes	Inhibitor

## Sheet: Table S6
Supplementary Table 6. The data about anticancer medication according to potential targets for prostate cancer
Target	Gene	Uniprot ID	Medication	Indication	Actions
Beta-microseminoprotein	MSMB	P08118	NA	NA	NA
Protein O-glucosyltransferase 3	KDELC2	Q7Z4H8	NA	NA	NA
Kunitz-type protease inhibitor 2	SPINT2	O43291	NA	NA	NA
Cation-independent mannose-6-phosphate receptor	IGF2R	P11717	Cerliponase alfa	Cerliponase alfa is a treatment for late infantile neuronal ceroid lipofuscinosis type 2 (CLN2) disease to decelerate the progressive motor function decline in patients 3 years of age and older. CLN2 disease is a form of Batten disease, a rare inherited neurodegenerative disorder and is associated with seizures, ataxia, rapid loss of language and motor functions, blindness, and early death 4. It …	Ligand
			Avalglucosidase alfa	Avalglucosidase alfa is a hydrolytic lysosomal glycogen-specific enzyme indicated for the treatment of patients with late-onset Pompe disease (lysosomal acid alpha-glucosidase [GAA] deficiency).In the US, it is approved in patients one year of age and older.	Ligand
			Cipaglucosidase alfa	In Europe and the US, cipaglucosidase alfa is a long-term enzyme replacement therapy used in combination with the enzyme stabilizer miglustat for the treatment of adults with late-onset Pompe disease, also known as acid α-glucosidase (GAA) deficiency.	Ligand
			alpha-D-mannose 6-phosphate	NA	Unknown
			Mecasermin	For the long-term treatment of growth failure in pediatric patients with Primary IGFD or with GH gene deletion who have developed neutralizing antibodies to GH 1. It is not indicated to treat Secondary IGFD resulting from GH deficiency, malnutrition, hypothyroidism or other causes; it is not a substitute for GH therapy.	Unknown
			Mecasermin rinfabate	Mecasermin rinfabate was approved for treatment of severe primary insulin-like growth factor (IGF) deficiency or in patients with GH gene deletion who have developed antibodies to growth hormone (GH)	Unknown
Tumor necrosis factor receptor superfamily member 10B	TNFRSF10B	O14763	HGS-TR2J	HGS-TR2J binds TRAIL Receptor 2 with high affinity, induces apoptosis and has anti-tumor activity, both as a single agent and in combination with chemotherapy. HGS-TR2J mimics the activity of native TRAIL (tumor necrosis factor-related apoptosis-inducing ligand) and, thus, is considered an agonistic antibody. Numerous nonclinical studies have shown that cell lines derived from a broad array of so…	Unknown
			Lexatumumab	Lexatumumab agonizes the tumor necrosis factor-related apoptosis-inducing ligand (TRAIL) receptor 2 (TRAIL-R2), triggering the extrinsic apoptotic pathway	Agonist（activating）
			Bioymifi	In cancer cells, tumor necrosis factor (TNF)-related apoptosis-induced ligand (TRAIL) initiates apoptosis by binding to death receptor 5 (DR5). In contrast, normal cells express high levels of decoy receptors (DcRs) that partially or completely lack the functional death domain (DD). Therefore, the binding of TRAIL on normal cells does not induce cell death.3 Because of this, small molecules that …	Binder
Glutathione S-transferase P	GSTP1	P09211	Chlorambucil	For treatment of chronic lymphatic (lymphocytic) leukemia, childhood minimal-change nephrotic syndrome, and malignant lymphomas including lymphosarcoma, giant follicular lymphoma, Hodgkin's disease, non-Hodgkin's lymphomas, and Waldenström’s Macroglobulinemia	Substrate
			Busulfan	For use in combination with cyclophosphamide as a conditioning regimen prior to allogeneic hematopoietic progenitor cell transplantation for chronic myelogenous (myeloid, myelocytic, granulocytic) leukemia (FDA has designated busulfan as an orphan drug for this use). It is also used as a component of pretransplant conditioning regimens in patients undergoing bone marrow transplantation for acute …	Substrate
			Etoposide	For use in combination with other chemotherapeutic agents in the treatment of refractory testicular tumors and as first line treatment in patients with small cell lung cancer. Also used to treat other malignancies such as lymphoma, non-lymphocytic leukemia, and glioblastoma multiforme.	Substrate
			Cisplatin	For the treatment of metastatic testicular tumors, metastatic ovarian tumors and advanced bladder cancer.	Substrate
			Carboplatin	Carboplatin is indicated in combination with an established combination of chemotherapeutic agents for the initial treatment of advanced ovarian carcinoma.Carboplatin is also indicated for the palliative treatment of ovarian carcinoma, recurrent after prior chemotherapy.	Substrate
			Oxaliplatin	Oxaliplatin, in combination with infusional fluorouracil and leucovorin, is indicated for the treatment of advanced colorectal cancer and adjuvant treatment of stage III colon cancer in patients who have undergone complete resection of the primary tumor	Substrate
			Acetaminophen	In general, acetaminophen is used for the treatment of mild to moderate pain and reduction of fever.23 It is available over the counter in various forms, the most common being oral forms.Acetaminophen injection is indicated for the management of mild to moderate pain, the management of moderate to severe pain with adjunctive opioid analgesics, and the reduction of fever.Label.Because of its low r…	Substrate
			Ritlecitinib	Ritlecitinib is indicated for the treatment of severe alopecia areata in adults and adolescents 12 years and older. It is not recommended for use in combination with other JAK inhibitors, biologic immunomodulators, cyclosporine or other potent immunosuppressants	Substrate
			Clomipramine	May be used to treat obsessive-compulsive disorder and disorders with an obsessive-compulsive component (e.g. depression, schizophrenia, Tourette’s disorder). Unlabeled indications include: depression, panic disorder, chronic pain (e.g. central pain, idiopathic pain disorder, tension headache, diabetic peripheral neuropathy, neuropathic pain), cataplexy and associated narcolepsy (limited evidence…	Inhibitor
			Vitamin E	Vitamin E supplementation is indicated for treatment of vitamin E deficiency which can occur in cystic fibrosis, cholestasis and severe liver disease, abetalipoproteinemia or simply poor diet	Inhibitor
			Exisulind	Investigated for use/treatment in adenomatous polyposis coli, lung cancer, prostate cancer, colon polyps, Barrett's esophagus disease, and pediatric indications.	Inhibitor
			Hypericin	NA	Inhibitor
			Etacrynic acid	For the treatment of high blood pressure and edema caused by diseases like congestive heart failure, liver failure, and kidney failure	Inhibitor
			alpha-Tocopherol succinate	Its antioxidant abilities may be used to help assist in preventing or treating a number of different conditions like cardiovascular disease, ocular conditions, diabetes, cancer and so on	Inhibitor
			D-alpha-Tocopherol acetate	It may be helpful in some neurological diseases including Alzheimer's, some eye disorders including cataracts, and diabetes and premenstrual syndrome. It may also help protect skin from ultraviolet irradiation although claims that it reverses skin aging, enhances male fertility and exercise performance are poorly supported.	Inhibitor
			Curcumin	NA	Inhibitor
			IFOSFAMIDE	Ifosfamide requires activation by microsomal liver enzymes to active metabolites in order to exert its cytotoxic effects. Activation occurs by hydroxylation at the ring carbon atom 4 to form the unstable intermediate 4-hydroxyifosfamide. This metabolite than rapidly degrades to the stable urinary metabolite 4-ketoifosfamide. The stable urinary metabolite, 4-carboxyifosfamide, is formed upon openi…	Inhibitor
			CYTARABINE	Cytarabine is an antineoplastic anti-metabolite used in the treatment of several forms of leukemia including acute myelogenous leukemia and meningeal leukemia. Anti-metabolites masquerade as purine or pyrimidine - which become the building blocks of DNA. They prevent these substances becoming incorporated in to DNA during the "S" phase (of the cell cycle), stopping normal development and division…	Inhibitor
			AZCITICDINE	Azacitidine (for subcutaneous or intravenous use) is indicated for the treatment of adult patients with the following French-American-British (FAB) myelodysplastic syndrome (MDS) subtypes: refractory anemia (RA) or refractory anemia with ringed sideroblasts (RARS) (if accompanied by neutropenia or thrombocytopenia or requiring transfusions), refractory anemia with excess blasts (RAEB), refractory…	Inhibitor
			DECITABINE	Decitabine is indicated for the treatment of patients with myelodysplastic syndromes (MDS) including all French-American-British subtypes (refractory anemia, refractory anemia with ringed sideroblasts, refractory anemia with excess blasts, refractory anemia with excess blasts in transformation, and chronic myelomonocytic leukemia), as well as for MDS scored as belonging to the intermediate-1, int…	Inhibitor

## Sheet: Table S7
Supplementary Table 7. the sequence of proteins for protein complexes prediction
Protein	sequence of protein
AR	MEVQLGLGRVYPRPPSKTYRGAFQNLFQSVREVIQNPGPRHPEAASAAPPGASLLLLQQQQQQQQQQQQQQQQQQQQQQQETSPRQQQQQQGEDGSPQAHRRGPTGYLVLDEEQQPSQPQSALECHPERGCVPEPGAAVAASKGLPQQLPAPPDEDDSAAPSTLSLLGPTFPGLSSCSADLKDILSEASTMQLLQQQQQEAVSEGSSSGRAREASGAPTSSKDNYLGGTSTISDNAKELCKAVSVSMGLGVEALEHLSPGEQLRGDCMYAPLLGVPPAVRPTPCAPLAECKGSLLDDSAGKSTEDTAEYSPFKGGYTKGLEGESLGCSGSAAAGSSGTLELPSTLSLYKSGALDEAAAYQSRDYYNFPLALAGPPPPPPPPHPHARIKLENPLDYGSAW…
BCL2	MAHAGRTGYDNREIVMKYIHYKLSQRGYEWDAGDVGAAPPGAAPAPGIFSSQPGHTPHPAASRDPVARTSPLQTPAAPGAAAGPALSPVPPVVHLTLRQAGDDFSRRYRRDFAEMSSQLHLTPFTARGRFATVVEELFRDGVNWGRIVAFFEFGGVMCVESVNREMSPLVDNIALWMTEYLNRHLHTWIQDNGGWDAFVELYGPSMRPLFDFSWLSLKTLLSLALVGACITLGAYLGHK
CYP17A1	MWELVALLLLTLAYLFWPKRRCPGAKYPKSLLSLPLVGSLPFLPRHGHMHNNFFKLQKKYGPIYSVRMGTKTTVIVGHHQLAKEVLIKKGKDFSGRPQMATLDIASNNRKGIAFADSGAHWQLHRRLAMATFALFKDGDQKLEKIICQEISTLCDMLATHNGQSIDISFPVFVAVTNVISLICFNTSYKNGDPELNVIQNYNEGIIDNLSKDSLVDLVPWLKIFPNKTLEKLKSHVKIRNDLLNKILENYKEKFRSDSITNMLDTLMQAKMNSDNGNAGPDQDSELLSDNHILTTIGDIFGAGVETTTSVVKWTLAFLLHNPQVKKKLYEEIDQNVGFSRTPTISDRNRLLLLEATIREVLRLRPVAPMLIPHKANVDSSIGEFAVDKGTEVIINLWAL…
GSTP1	MPPYTVVYFPVRGRCAALRMLLADQGQSWKEEVVTVETWQEGSLKASCLYGQLPKFQDGDLTLYQSNTILRHLGRTLGLYGKDQQEAALVDMVNDGVEDLRCKYISLIYTNYEAGKDDYVKALPGQLKPFETLLSQNQGGKTFIVGDQISFADYNLLDLLLIHEVLAPGCLDAFPLLSAYVGRLSARPKLKAFLASPEYVNLPINGNGKQ
IGF2R	MGAAAGRSPHLGPAPARRPQRSLLLLQLLLLVAAPGSTQAQAAPFPELCSYTWEAVDTKNNVLYKINICGSVDIVQCGPSSAVCMHDLKTRTYHSVGDSVLRSATRSLLEFNTTVSCDQQGTNHRVQSSIAFLCGKTLGTPEFVTATECVHYFEWRTTAACKKDIFKANKEVPCYVFDEELRKHDLNPLIKLSGAYLVDDSDPDTSLFINVCRDIDTLRDPGSQLRACPPGTAACLVRGHQAFDVGQPRDGLKLVRKDRLVLSYVREEAGKLDFCDGHSPAVTITFVCPSERREGTIPKLTAKSNCRYEIEWITEYACHRDYLESKTCSLSGEQQDVSIDLTPLAQSGGSSYISDGKEYLFYLNVCGETEIQFCNKKQAAVCQVKKSDTSQVKAAGRYH…
MSMB	MNVLLGSVVIFATFVTLCNASCYFIPNEGVPGDSTRKCMDLKGNKHPINSEWQTDNCETCTCYETEISCCTLVSTPVGYDKDNCQRIFKKEDCKYIVVEKKDPKKTCSVSEWII
TNFRSF10B	MEQRGQNAPAASGARKRHGPGPREARGARPGPRVPKTLVLVVAAVLLLVSAESALITQQDLAPQQRAAPQQKRSSPSEGLCPPGHHISEDGRDCISCKYGQDYSTHWNDLLFCLRCTRCDSGEVELSPCTTTRNTVCQCEEGTFREEDSPEMCRKCRTGCPRGMVKVGDCTPWSDIECVHKESGTKHSGEVPAVEETVTSSPGTPASPCSLSGIIIGVTVAAVVLIVAVFVCKSLLWKKVLPYLKGICSGGGGDPERVDRSSQRPGAEDNVLNEIVSILQPTQVPEQEMEVQEPAEPTGVNMLSPGESEHLLEPAEAERSQRRRLLVPANEGDPTETLRQCFDDFADLVPFDSWEPLMRKLGLMDNEIKVAKAEAAGHRDTLYTMLIKWVNKTGRDASV…
TXNRD1	MNGPEDLPKSYDYDLIIIGGGSGGLAAAKEAAQYGKKVMVLDFVTPTPLGTRWGLGGTCVNVGCIPKKLMHQAALLGQALQDSRNYGWKVEETVKHDWDRMIEAVQNHIGSLNWGYRVALREKKVVYENAYGQFIGPHRIKATNNKGKEKIYSAERFLIATGERPRYLGIPGDKEYCISSDDLFSLPYCPGKTLVVGASYVALECAGFLAGIGLDVTVMVRSILLRGFDQDMANKIGEHMEEHGIKFIRQFVPIKVEQIEAGTPGRLRVVAQSTNSEEIIEGEYNTVMLAIGRDACTRKIGLETVGVKINEKTGKIPVTDEEQTNVPYIYAIGDILEDKVELTPVAIQAGRLLAQRLYAGSTVKCDYENVPTTVFTPLEYGACGLSEEKAVEKFGEENI…
TXN	MVKQIESKTAFQEALDAAGDKLVVVDFSATWCGPCKMIKPFFHSLSEKYSNVIFLEVDVDDCQDVASECEVKCMPTFQFFKKGQKVGEFSGANKEKLEATINELV
TOP2A	MEVSPLQPVNENMQVNKIKKNEDAKKRLSVERIYQKKTQLEHILLRPDTYIGSVELVTQQMWVYDEDVGINYREVTFVPGLYKIFDEILVNAADNKQRDPKMSCIRVTIDPENNLISIWNNGKGIPVVEHKVEKMYVPALIFGQLLTSSNYDDDEKKVTGGRNGYGAKLCNIFSTKFTVETASREYKKMFKQTWMDNMGRAGEMELKPFNGEDYTCITFQPDLSKFKMQSLDKDIVALMVRRAYDIAGSTKDVKVFLNGNKLPVKGFRSYVDMYLKDKLDETGNSLKVIHEQVNHRWEVCLTMSEKGFQQISFVNSIATSKGGRHVDYVADQIVTKLVDVVKKKNKGGVAVKAHQVKNHMWIFVNALIENPTFDSQTKENMTLQPKSFGSTCQLSEKFI…
TOP2B	MAKSGGCGAGAGVGGGNGALTWVTLFDQNNAAKKEESETANKNDSSKKLSVERVYQKKTQLEHILLRPDTYIGSVEPLTQFMWVYDEDVGMNCREVTFVPGLYKIFDEILVNAADNKQRDKNMTCIKVSIDPESNIISIWNNGKGIPVVEHKVEKVYVPALIFGQLLTSSNYDDDEKKVTGGRNGYGAKLCNIFSTKFTVETACKEYKHSFKQTWMNNMMKTSEAKIKHFDGEDYTCITFQPDLSKFKMEKLDKDIVALMTRRAYDLAGSCRGVKVMFNGKKLPVNGFRSYVDLYVKDKLDETGVALKVIHELANERWDVCLTLSEKGFQQISFVNSIATTKGGRHVDYVVDQVVGKLIEVVKKKNKAGVSVKPFQVKNHIWVFINCLIENPTFDSQTK…
RARA	MASNSSSCPTPGGGHLNGYPVPPYAFFFPPMLGGLSPPGALTTLQHQLPVSGYSTPSPATIETQSSSSEEIVPSPPSPPPLPRIYKPCFVCQDKSSGYHYGVSACEGCKGFFRRSIQKNMVYTCHRDKNCIINKVTRNRCQYCRLQKCFEVGMSKESVRNDRNKKKKEVPKPECSESYTLTPEVGELIEKVRKAHQETFPALCQLGKYTTNNSSEQRVSLDIDLWDKFSELSTKCIIKTVEFAKQLPGFTTLTIADQITLLKAACLDILILRICTRYTPEQDTMTFSDGLTLNRTQMHNAGFGPLTDLVFAFANQLLPLEMDDAETGLLSAICLICGDRQDLEQPDRVDMLQEPLLEALKVYVRKRRPSRPHMFPKMLMKITDLRSISAKGAERVITLK…

## Sheet: Table S8
Supplementary Table 8. Genetic Instruments for Drug Targets Validated in External Validation
UK-Biobank
Proteins	Outcome	SNP	effect allele	other allele	beta	se	pval	or	or_lci95	or_uci95
TNFRSF10B	Prostate cancer	rs4871844	T	C	-0.306993	0.0594406	2.41e-07	0.735656	0.654753	0.826554
SPINT2	Prostate cancer	rs71354995	G	A	0.0441978	0.00918264	1.49e-06	1.04519	1.02655	1.06417
MSMB	Prostate cancer	rs10993994	C	T	-0.211303	0.00814664	2.52e-148	0.809528	0.796705	0.822558
GSTP1	Prostate cancer	rs1695	G	A	-0.193258	0.047191	4.22e-05	0.824269	0.751448	0.904146
IGF2R	Prostate cancer	rs629849	G	A	-0.0832036	0.0133482	4.57e-10	0.920164	0.896402	0.944555
decode_TNFRSF10B_same	Prostate cancer	rs4871844	T	C	-0.21488	0.0766279	0.00504425	0.806639	0.694148	0.937359
decode_SPINT2_same	Prostate cancer	rs71354995	G	A	0.000821844	0.000289031	0.00446285	1.00082	1.00026	1.00139
decode_MSMB_same	Prostate cancer	rs10993994	C	T	0.00142779	0.000147778	4.38242e-22	1.00143	1.00114	1.00172
decode_GSTP1_same	Prostate cancer	rs1695	G	A	-0.00273548	0.00137456	0.0465835	0.997268	0.994585	0.999959
decode_IGF2R_same	Prostate cancer	rs629849	G	A	-5.71452e-05	0.000733477	0.9379	0.999943	0.998506	1.00138
European Bioinformatics Institute
Proteins	Outcome	SNP	effect allele	other allele	beta	se	pval	or	or_lci95	or_uci95
KDELC2	Prostate cancer	rs74911261	A	G	-0.114231	0.0203196	1.89e-08	0.892052	0.857222	0.928296
IGF2R	Prostate cancer	rs629849	G	A	-0.0832036	0.0133482	4.57e-10	0.920164	0.896402	0.944555
TNFRSF10B	Prostate cancer	rs4871844	T	C	-0.306993	0.0594406	2.41e-07	0.735656	0.654753	0.826554
SPINT2	Prostate cancer	rs71354995	G	A	0.0441978	0.00918264	1.49e-06	1.04519	1.02655	1.06417
GSTP1	Prostate cancer	rs1695	G	A	-0.193258	0.047191	4.22e-05	0.824269	0.751448	0.904146
decode_KDELC2_same	Prostate cancer	rs74911261	A	G	-0.161224	0.0480533	0.000793357	0.851101	0.7746	0.935158
decode_IGF2R_same	Prostate cancer	rs629849	G	A	0.0339401	0.0356466	0.341032	1.03452	0.964711	1.10939
decode_TNFRSF10B_same	Prostate cancer	rs4871844	C	T	-11.6667	5.25	0.0262683	8.57494e-06	2.913e-10	0.252419
decode_SPINT2_same	Prostate cancer	rs71354995	G	A	0.0925577	0.0184245	5.0706e-07	1.09698	1.05807	1.13731
decode_GSTP1_same	Prostate cancer	rs1695	G	A	-0.0736926	0.0942948	0.434501	0.928957	0.772201	1.11753
decode_GSTP1_significant	Prostate cancer	rs1254123	C	T	5.44444	15	0.716633	231.469	3.9467e-11	1357531598498590
decode_IGF2R_significant	Prostate cancer	rs13192111	A	T	-0.0807058	0.0491756	0.100761	0.922465	0.837704	1.0158
